# Supplementary material for: Loss-of-function but not dominant-negative intragenic IKZF1 deletions are associated with an adverse prognosis in adult BCR-ABL-negative acute lymphoblastic leukemia
Source: PubMed Central journal article supplement — Haematologica. 2017 Jul 27;102(10):1739–47. doi: 10.3324/haematol.2016.161273 (PMC5622858; doi:10.3324/haematol.2016.161273), 2017-10

## Loss-of-function but not dominant-negative intragenic *IKZF1* deletions are associated with an adverse prognosis in adult *BCR-ABL*-negative acute lymphoblastic leukemia

Benjamin Kobitzsch,<sup>1</sup> Nicola Gökbuget,<sup>2</sup> Stefan Schwartz,<sup>1</sup> Richard Reinhardt,<sup>3</sup> Monika Brüggemann,<sup>4</sup> Andreas Viardot,<sup>5</sup> Ralph Wäsch,<sup>6</sup> Michael Starck,<sup>7</sup> Eckhard Thiel,<sup>1</sup> Dieter Hoelzer<sup>2</sup> and Thomas Burmeister<sup>1</sup>

<sup>1</sup>Department of Hematology, Oncology and Tumor Immunology, Charité Universitätsmedizin Berlin; <sup>2</sup>Department of Medicine II, Hematology/Oncology, Goethe University, Frankfurt/Main; <sup>3</sup>Max Planck Genome Center, Köln; <sup>4</sup>Department of Hematology, University Hospital Schleswig-Holstein, Kiel; <sup>5</sup>Department of Medicine III (Hematology, Oncology), Ulm University; <sup>6</sup>Department of Hematology, Oncology and Stem Cell Transplantation, University of Freiburg Medical Center, and <sup>7</sup>Department of Hematology, Klinikum München-Schwabing, Munich, Germany

©2017 Ferrata Storti Foundation. This is an open-access paper. doi:10.3324/haematol.2016.161273

Received: January 12, 2017.

Accepted: July 18, 2017.

Pre-published: July 27, 2017.

Correspondence: thomas.burmeister@charite.de

---

## Supplementary Methods

|                                            |   |
|--------------------------------------------|---|
| Nucleic acid preparation                   | 2 |
| Identification of rare genomic breakpoints | 2 |
| Sequencing and bioinformatic analysis      | 2 |
| Statistical analysis                       | 3 |

## Supplementary Tables

|                                                                                                                                                             |    |
|-------------------------------------------------------------------------------------------------------------------------------------------------------------|----|
| <b>Supplementary Table 1:</b> Results of previous studies on the prognostic effect of <i>IKZF1</i> deletions in BCR-ABL-negative adult patients             | 4  |
| <b>Supplementary Table 2:</b> Blast count of all 482 patient samples                                                                                        | 4  |
| <b>Supplementary Table 3:</b> Blast count of 127 patient samples that were <i>IKZF1</i> deleted and where <i>IKZF1</i> deletions were quantified            | 4  |
| <b>Supplementary Table 4:</b> Oligonucleotides used in experiments                                                                                          | 5  |
| <b>Supplementary Table 5:</b> Oligonucleotides used on single patients only                                                                                 | 6  |
| <b>Supplementary Table 6:</b> Characteristics of all patients                                                                                               | 7  |
| <b>Supplementary Table 7:</b> Characteristics of patients with multiple <i>IKZF1</i> mutations                                                              | 8  |
| <b>Supplementary Table 8:</b> Characteristics of patients according to <i>IKZF1</i> status                                                                  | 9  |
| <b>Supplementary Table 9:</b> Characteristics of patients according to different <i>IKZF1</i> deletion types                                                | 10 |
| <b>Supplementary Table 10:</b> Sequence of all breakpoints with accession numbers                                                                           | 11 |
| <b>Supplementary Table 11:</b> Putative cryptic recombination signal sequences near breakpoints                                                             | 18 |
| <b>Supplementary Table 12:</b> Comparison between diagnosis and relapse of 20 mutations in 16 patients with <i>IKZF1</i> mutations at the time of diagnosis | 21 |

## Supplementary Figures

|                                                                                                                             |    |
|-----------------------------------------------------------------------------------------------------------------------------|----|
| <b>Supplementary Figure 1:</b> Quantification of deletions $\Delta 4-7$ , $\Delta 2-7$ and $\Delta 4-8$ by quantitative PCR | 22 |
| <b>Supplementary Figure 2:</b> Detection of $\Delta 2-3$ by RT-PCR                                                          | 23 |
| <b>Supplementary Figure 3:</b> Additional evaluation of the prognostic effect of <i>IKZF1</i> mutations                     | 24 |
| <b>Supplementary Figure 4:</b> Detection of rare breakpoints by RT-PCR                                                      | 25 |

# Supplementary Methods

## Nucleic acid preparation

DNA and RNA were prepared by TRIzol (Life Technologies, Darmstadt, Germany) or by AllPrep DNA/RNA (QIAGEN, Hilden, Germany). TRIzol DNA was purified using DNA Clean & Concentrate (Zymo Research, Freiburg, Germany). Reverse transcription was performed using between 150ng-1µg RNA, either by Ready-To-Go You-Prime First-Strand Beads (GE Healthcare Europe, Freiburg, Germany) or by Transcriptor First Strand cDNA Synthesis Kit (Roche, Mannheim, Germany).

## Identification of rare genomic breakpoints

To identify genomic breakpoints in patients positive for  $\Delta 2-3$  in RT-PCR ex1/4 we used the multiplex PCR by Meyer et al.<sup>1</sup> with all 16 primers at 150 nM and the FastStart High Fidelity PCR System kit (Roche) under the following conditions: 2 min at 94°C, 10 cycles of 10 sec at 94°C, 30 sec at 64°C, 5 min at 68°C followed by 25 cycles with additional 20 sec elongation for each cycle. Cases negative in this PCR were further investigated with a different PCR  $\Delta 2-3B$  (forward primer by Meyer and reverse primers I3-R1A GTCCTTTGCACTGATGACTTATTCCCATG, I3-R1B CATCTGGGTTTGGATATGTTTCATGCTGAC, I3-R1C CTACCCTGTAAATACCATCCCCTAGTCC, I3-R13B CACTGACAGACAAGAAGTTAGCTGAGG, with 250 nM of each primer).

In cases with atypical RT-PCR products, breakpoints were identified using primers as specified in Supplemental Methods (Tables S4-5). For  $\Delta 2$  (primer concentration 150 nM) and  $\Delta 5-7$  (primer concentration 300 nM) the FastStart High Fidelity PCR System (Roche) was used as described above. PCRs  $\Delta 2-7B$  and  $\Delta 4-7B$  were used with the HotStarTaq kit (QIAGEN) at 500 nM primer concentration and the following conditions: 15 min at 95°C, followed by 35 cycles of 30 sec at 94°C, 60 sec min at 65°C and 2.5 min at 72°C.

## Sequencing and bioinformatic analysis

All PCR products were purified using the GenUP PCR Cleanup Kit (Biotech rabbit, Hennigsdorf, Germany). Multiple bands were excised from agarose gel and purified using the ThermoScientific GeneJET Gel Extraction Kit (Life Technologies, Darmstadt, Germany). Products were analyzed by Sanger sequencing using routine methods at the Max Planck Genome Center, Cologne, Germany. All sequences were submitted to the EMBL nucleotide sequence database (accession numbers LN875583-LN875775) and were analyzed using RSSsite for the presence of cryptic recombination signal sequences (cRSS) near the two breakpoint locations.<sup>2</sup>

---

<sup>1</sup> Meyer C, zur Stadt U, Escherich G, Hofmann J, Binato R, da Conceição Barbosa T et al. Refinement of IKZF1 recombination hotspots in pediatric BCP-ALL patients. *Am J Blood Res* 2013; 3: 165-173.

<sup>2</sup> Merelli I, Guffanti A, Fabbri M, Cocito A, Furia L, Grazini U et al. RSSsite: a reference database and prediction tool for the identification of cryptic Recombination Signal Sequences in human and murine genomes. *Nucleic Acids Res* 2010; 38 Suppl: W262-7.

## **Statistical analysis**

Survival analyses were performed according to the Kaplan-Meier method. Overall survival was calculated from date of diagnosis until death or last follow-up. Disease free survival was calculated from date of first complete remission to relapse or death from any cause. Survival rates are given as probabilities of survival at 5 years, with a 95% confidence interval. The log-rank test was used to compare survival curves. Differences between 2 groups were compared by the two-tailed Fisher's test, differences between 3 or more groups by Pearson's chi square. For all analyses,  $p \leq 0.05$  was considered statistically significant. Statistics were calculated using SAS 9.4 (SAS Institute Inc., Cary, NC, USA) and IBM SPSS Statistics v22 (IBM Germany, Ehningen, Germany).

## Supplementary Tables

**Supplementary Table 1:** Results of previous studies on the prognostic effect of *IKZF1* deletions in BCR-ABL-negative adult patients (Abbreviations: pts = patients; CIR = cumulative incidence of relapse; EFS = event-free survival; RFS = relapse-free survival; OS = overall survival; HR = hazard ratio; n.s. = not significant)

| study         | pts | <i>IKZF1</i> deletion                             | value            | statistic              | results                                                                                                  |
|---------------|-----|---------------------------------------------------|------------------|------------------------|----------------------------------------------------------------------------------------------------------|
| Beldjord 2014 | 216 | focal vs. wildtype                                | CIR              | multivariate Cox model | <b>HR 2.65 (1.48-4.73), p=0.001</b>                                                                      |
|               | 324 | focal vs. wildtype                                |                  | univariate Cox model   | <b>HR 2.24 (1.39-3.62), p=0.001</b>                                                                      |
|               |     | complete vs. wildtype                             |                  | univariate Cox model   | HR 1.01 (0.91-1.11), n.s. (p=0.85)                                                                       |
|               |     | Δ4-7 vs. Δ2-7/Δ4-8 vs. other                      |                  | Kaplan Meyer           | n.s. (no p-value given)                                                                                  |
| Moorman 2012  | 304 | any deletion vs. wildtype                         | EFS<br>RFS<br>OS | multivariate Cox model | 1.26 (0.89-1.78), n.s. (p=0.196)<br>1.23 (0.78-1.93), n.s. (p=0.375)<br>1.23 (0.86-1.76), n.s. (p=0.263) |
|               |     | any deletion vs. wildtype                         | EFS<br>RFS<br>OS | univariate Cox model   | <b>1.54 (1.12-2.12), p=0.008</b><br>1.48 (0.98-2.24), n.s. (p=0.63)<br><b>1.55 (1.11-2.16), p=0.010</b>  |
|               |     | other deletions vs. Ik6                           | EFS              | univariate Cox model   | <b>HR 2.17 (1.21-3.89), p=0.009</b>                                                                      |
| Mi 2012       | 134 | Ik6 vs. wildtype                                  | RFS              | Log-rank test          | n.s. (p=0.114)                                                                                           |
| Dupuis 2012   | 113 | any deletion vs. wildtype                         | PFS              | Log-rank test          | <b>0.004</b>                                                                                             |
|               |     | haploinsufficient and null-mutations vs. wildtype | OS<br>PFS        | Log-rank test          | <b>0.01</b><br><b>0.003</b>                                                                              |

**Supplementary Table 2:** Blast count of all 482 patient samples, percentage by samples type

| material                        | <50% blasts | 50-75% blasts | >75% blasts | total |
|---------------------------------|-------------|---------------|-------------|-------|
| bone marrow                     | 14 (4,3%)   | 36 (10,9%)    | 280 (84,8%) | 330   |
| peripheral blood                | 22 (16,7%)  | 34 (25,8%)    | 76 (57,5%)  | 132   |
| bone marrow or peripheral blood | 3 (15,0%)   | 4 (20%)       | 13 (65,0%)  | 20    |
| total                           | 39 (8,0%)   | 74 (15,4%)    | 369 (76,6%) | 482   |

**Supplementary Table 3:** Blast count of 127 patient samples that were *IKZF1* deleted and where *IKZF1* deletions were quantified

| material                        | <50% blasts | 50-75% blasts | >75% blasts | total |
|---------------------------------|-------------|---------------|-------------|-------|
| bone marrow                     | 2 (2,3%)    | 7 (7,9%)      | 79 (89,8%)  | 88    |
| peripheral blood                | 2 (5,9%)    | 11 (32,3%)    | 21 (61,8%)  | 34    |
| bone marrow or peripheral blood | 2 (40%)     | 1 (20%)       | 2 (40%)     | 5     |
| total                           | 6 (4,7%)    | 19 (15,0%)    | 102 (80,3%) | 127   |

**Supplementary Table 4: Oligonucleotides used in experiments**

| <b>Experiment</b>     | <b>Name</b>                    | <b>Oligonucleotide sequence (5'-3')</b> |
|-----------------------|--------------------------------|-----------------------------------------|
| PCR Δ2-7              | IKZF1-F2A                      | ACTACAGAGACTTCAGCTCTATTCCATTTTC         |
|                       | IKZF1-F2B                      | TGATTTGGATGTGTGTGTTTCATGCGTGG           |
|                       | IKZF1-F7                       | ACCATCAAATACAGGTCAACAGGACTGA            |
|                       | IKZF1-R7                       | AGGGACTCTCTAGACAAAATGGCAGGA             |
| PCR Δ2-8              | IKZF1-F2A                      | ACTACAGAGACTTCAGCTCTATTCCATTTTC         |
|                       | IKZF1-F2B                      | TGATTTGGATGTGTGTGTTTCATGCGTGG           |
|                       | IKZF1-F8                       | CCCCTGCACAGATGAACAGAGCA                 |
|                       | IKZF1-R8                       | CCTCCTGCTATTGCACGTCTCGGT                |
| PCR Δ4-7              | IKZF1-F4                       | CTTAGAAGTCTGGAGTCTGTGAAGGTC             |
|                       | IKZF1-F7                       | ACCATCAAATACAGGTCAACAGGACTGA            |
|                       | IKZF1-R7                       | AGGGACTCTCTAGACAAAATGGCAGGA             |
| PCR Δ4-8              | IKZF1-F4                       | CTTAGAAGTCTGGAGTCTGTGAAGGTC             |
|                       | IKZF1-F8                       | CCCCTGCACAGATGAACAGAGCA                 |
|                       | IKZF1-R8                       | CCTCCTGCTATTGCACGTCTCGGT                |
| PCR Δ2-3 (Meyer 2013) | IKZF1.I1.F1B                   | AGTTCACTTCTGTCAAGCGTCTGTTGCTCT          |
|                       | IKZF1.I1.F2                    | TGGATGTGTGTGTTTCATGCGTGGTTAATA          |
|                       | IKZF1.I1.F3                    | TCATGTGGACCATGGCTTTCTTGATTTCT           |
|                       | IKZF1.I1.F4                    | TGGCTGAAAATGGGTCCTAATTAGTGGA            |
|                       | IKZF1.I3.R2                    | GATGGCACTGGCAGTCATTTCTCTATGTCT          |
|                       | IKZF1.I3.R4                    | TCTAGGAAGGACTTGGGCACATTGAAGAAT          |
|                       | IKZF1.I3.R5                    | CTGTTACTGCCTGCAGGATAGACTTCTGGA          |
|                       | IKZF1.I3.R6                    | TCTCGGCACTTACACACACTCTTTTAGGC           |
|                       | IKZF1.I3.R7                    | GGTACCCCAACCCATCCTTATACATGACAC          |
|                       | IKZF1.I3.R8                    | CTGGCACTTCTGTCAAACCTCACATCTCT           |
|                       | IKZF1.I3.R9                    | CTTCCGGGTCCAGGATCTCCATATAACAAT          |
|                       | IKZF1.I3.R10                   | TTTCATATAAAATGCTGCGAACACCTTGGA          |
|                       | IKZF1.I3.R11                   | TATTCTCTTTTACAGGACAGTTTCCCAGCA          |
|                       | IKZF1.I3.R12                   | AATGTACACTGTTAGTCCCCACCTGACCAA          |
| IKZF1.I3.R13          | TGACTGAGACATAATGGACAAGAGCCCAAT |                                         |
| IKZF1.I3.R14          | CAAGGACTCTATGACTCGGTACCACTTGGA |                                         |
| PCR Δ2-3B             | IKZF1.I1.F1B                   | AGTTCACTTCTGTCAAGCGTCTGTTGCTCT          |
|                       | IKZF1.I1.F2                    | TGGATGTGTGTGTTTCATGCGTGGTTAATA          |
|                       | IKZF1.I1.F3                    | TCATGTGGACCATGGCTTTCTTGATTTCT           |
|                       | IKZF1.I1.F4                    | TGGCTGAAAATGGGTCCTAATTAGTGGA            |
|                       | IKZF1-I3-R1A                   | GTCCTTTGCACTGATGACTTATTCCCATG           |
|                       | IKZF1-I3-R1B                   | CATCTGGGTTTGGATATGTTTCATGCTGAC          |
|                       | IKZF1-I3-R1C                   | CTACCCTGTAATACCATCCCCTAGTCC             |
|                       | IKZF1-I3-R13B                  | CACTGACAGACAAGAAGTTAGCTGAGG             |
| RT-PCR ex1/8          | IKZF1-ex1FA                    | AAAGCGCGACGCACAAATCCA                   |
|                       | IKZF1-ex8R                     | CGTTGTTGATGGCTTGGTCCATCAC               |
| RT-PCR ex1/4          | IKZF1-ex1FB                    | CGAGGATCAGTCTTGGCCCCAA                  |
|                       | IKZF1-ex4R                     | GAATGCCTCCAACCTCCCGACAAAG               |

|                      |              |                                        |
|----------------------|--------------|----------------------------------------|
| qPCR Δ2-7            | IKZF1-q27-F1 | CATGTACATTTTTGATCTAGGTCTTAG            |
|                      | IKZF1-q27-R1 | GTAAATAAAGAACCCTCAGGCAT                |
|                      | IKZF1-q27-P1 | FAM-TCAGGAATAAAATGCAAATCACCTTGAAGA-BBQ |
| qPCR Δ4-7            | IKZF1-q47-F1 | CAGCCCATAGGGTATAAATAATCTG              |
|                      | IKZF1-q47-R1 | TTAAATAAAGAACCCTCAGGCATT               |
|                      | IKZF1-q47-P1 | FAM-AATTGACGGCATCCAGGGATCTCAG-BBQ1     |
| qPCR Δ4-8            | IKZF1-q48-F1 | AAAATATTCTTAGAAGTCTGGAGTCTG            |
|                      | IKZF1-q48-R1 | CCAAGCATGTCTCGGCATAC                   |
|                      | IKZF1-q48-R2 | GAAAAGCACTATTCCACGTAGAC                |
|                      | IKZF1-q48-P1 | Cy5-TGAAGGTCACACCCTCTGGTCTT-BBQ        |
| hck internal control | hck-f        | TATTAGCACCATCCATAGGAGGCTT              |
|                      | hck-r        | GTTAGGGAAAGTGGAGCGGAAG                 |
|                      | hck-p        | HEX-TAACGCGTCCACCAAGGATGCGAA-BHQ1      |

**Supplementary Table 5:** Oligonucleotides used on single patients only

| Experiment | Patient         | Name         | Oligonucleotide sequence (5'-3') |
|------------|-----------------|--------------|----------------------------------|
| PCR Δ2     | #119            | IKZF1.I1.F1B | AGTTCACCTTCTGTCAAGCGTCTGTTGCTCT  |
|            |                 | IKZF1.I1.F2  | TGGATGTGTGTGTTTCATGCGTGGTTAATA   |
|            |                 | IKZF1.I1.F3  | TCATGTGGACCATGGCTTTCTTGATTTCT    |
|            |                 | IKZF1.I1.F4  | TGGCTGAAAATGGGTCCTAATTAGTGGA     |
|            |                 | IKZF1-R2A    | CCCAGCTACCCTATCCTTTGAACAG        |
|            |                 | IKZF1-R2B    | CCAATGAAGAAATGTCGACTTTCCGC       |
|            |                 | IKZF1-R2C    | CTTGCATCCCTTCATCACTGTCTTGG       |
| PCR Δ2-7B  | #85, #199, #291 | IKZF1.I1.F1B | AGTTCACCTTCTGTCAAGCGTCTGTTGCTCT  |
|            |                 | IKZF1.I1.F2  | TGGATGTGTGTGTTTCATGCGTGGTTAATA   |
|            |                 | IKZF1.I1.F3  | TCATGTGGACCATGGCTTTCTTGATTTCT    |
|            |                 | IKZF1.I1.F4  | TGGCTGAAAATGGGTCCTAATTAGTGGA     |
|            |                 | IKZF1-R7     | AGGGACTCTCTAGACAAAATGGCAGGA      |
| PCR Δ4-7B  | #338            | IKZF1-F4B    | ACTCTGACTATACTCTCCTGGTATCACA     |
|            |                 | IKZF1-F4C    | CAAACCTGTTCTGGGCCAATATCACCAC     |
|            |                 | IKZF1-F4D    | TTCCAACCTCCTCCTTATTAGTGG         |
|            |                 | IKZF1-F4E    | TTTGTTCTGTTACAGCTCTCAGTGAC       |
|            |                 | IKZF1-F4F    | TGCAGCTAAGATTCCAGACCAGGTAT       |
|            |                 | IKZF1-R7     | AGGGACTCTCTAGACAAAATGGCAGGA      |
| PCR Δ5-7   | #424 (and #225) | IKZF1-F5A    | GAGTGGCCTCCTGTATTGTTCTTTTCAGC    |
|            |                 | IKZF1-F5B    | GATTGTCTGTGCCTATCTAGTTCCCATCTG   |
|            |                 | IKZF1-R7     | AGGGACTCTCTAGACAAAATGGCAGGA      |

**Supplementary Table 6: Characteristics of all patients**

|                        |                   |
|------------------------|-------------------|
| <b>Sex</b>             |                   |
| Male                   | 285 (59.1%)       |
| Female                 | 197 (40.9%)       |
| <b>Age</b>             |                   |
| 15-25                  | 172 (35.7%)       |
| 26-35                  | 97 (20.1%)        |
| 36-45                  | 78 (16.2%)        |
| 46-55                  | 87 (18.0%)        |
| 56-65                  | 48 (10.0%)        |
| <b>Immunophenotype</b> |                   |
| pre B ALL              | 111 (23.0%)       |
| common ALL             | 314 (65.2%)       |
| pro B ALL              | 57 (11.8%)        |
| <b>Leukocyte</b>       |                   |
| ≤30/nL                 | 308 (64.8%)       |
| >30/nL                 | 167 (35.2%)       |
| no data                | 7                 |
| <b>Risk group</b>      |                   |
| Standard risk          | 268 (55.6%)       |
| High risk              | 214 (44.4%)       |
| <b>CNS involvement</b> |                   |
| No                     | 372 (94.4%)       |
| Yes                    | 22 (5.6%)         |
| No data                | 88                |
| <b>Clinical course</b> |                   |
| CR                     | 428 (88.8%)       |
| ED                     | 31 (6.4%)         |
| Failure                | 23 (4.8%)         |
| <b>Total</b>           | <b>482 (100%)</b> |



**Supplementary Table 7:** Characteristics of patients with multiple *IKZF1* mutations (high deletion load mutations are shown in dark blue, low deletion load mutations in light blue, unquantified mutations in grey)

| patient | $\Delta 4-7$ | $\Delta 2-7$ | $\Delta 4-8$ | $\Delta 2-8$ | $\Delta 2-3$ | number of mutations |
|---------|--------------|--------------|--------------|--------------|--------------|---------------------|
| #29     | $\Delta 4-7$ | $\Delta 2-7$ |              |              |              | 2                   |
| #36     |              | $\Delta 2-7$ |              |              | $\Delta 2-3$ | 2                   |
| #46     |              |              | $\Delta 4-8$ |              | $\Delta 2-3$ | 2                   |
| #58     | $\Delta 4-7$ |              |              |              | $\Delta 2-3$ | 2                   |
| #100    | $\Delta 4-7$ | $\Delta 2-7$ |              |              |              | 2                   |
| #126    | $\Delta 4-7$ | $\Delta 2-7$ |              |              |              | 2                   |
| #127    | $\Delta 4-7$ |              | $\Delta 4-8$ |              |              | 2                   |
| #133    | $\Delta 4-7$ | $\Delta 2-7$ |              |              |              | 2                   |
| #143    |              |              | $\Delta 4-8$ |              | $\Delta 2-3$ | 2                   |
| #154    |              | $\Delta 2-7$ | $\Delta 4-8$ |              |              | 2                   |
| #157    |              | $\Delta 2-7$ |              |              | $\Delta 2-3$ | 2                   |
| #160    |              |              | $\Delta 4-8$ | $\Delta 2-8$ |              | 2                   |
| #174    | $\Delta 4-7$ |              |              |              | $\Delta 2-3$ | 2                   |
| #189    |              | $\Delta 2-7$ | $\Delta 4-8$ |              |              | 2                   |
| #198    | $\Delta 4-7$ | $\Delta 2-7$ |              |              |              | 2                   |
| #199    |              | $\Delta 2-7$ |              |              | $\Delta 2-3$ | 2                   |
| #204    |              | $\Delta 2-7$ |              |              | $\Delta 2-3$ | 2                   |
| #210    |              | $\Delta 2-7$ | $\Delta 4-8$ |              |              | 2                   |
| #215    |              | $\Delta 2-7$ |              |              | $\Delta 2-3$ | 2                   |
| #243    |              | $\Delta 2-7$ | $\Delta 4-8$ |              |              | 2                   |
| #256    |              | $\Delta 2-7$ |              |              | $\Delta 2-3$ | 2                   |
| #257    | $\Delta 4-7$ |              |              |              | $\Delta 2-3$ | 2                   |
| #266    |              | $\Delta 2-7$ |              |              | $\Delta 2-3$ | 2                   |
| #276    | $\Delta 4-7$ | $\Delta 2-7$ |              |              |              | 2                   |
| #335    | $\Delta 4-7$ | $\Delta 2-7$ |              |              |              | 2                   |
| #360    |              | $\Delta 2-7$ | $\Delta 4-8$ |              |              | 2                   |
| #400    | $\Delta 4-7$ |              | $\Delta 4-8$ |              |              | 2                   |
| #414    | $\Delta 4-7$ | $\Delta 2-7$ |              |              |              | 2                   |
| #108    | $\Delta 4-7$ | $\Delta 2-7$ | $\Delta 4-8$ |              |              | 3                   |
| #111    | $\Delta 4-7$ | $\Delta 2-7$ | $\Delta 4-8$ |              |              | 3                   |
| #113    | $\Delta 4-7$ | $\Delta 2-7$ |              |              | $\Delta 2-3$ | 3                   |
| #175    | $\Delta 4-7$ | $\Delta 2-7$ | $\Delta 4-8$ |              |              | 3                   |
| #285    | $\Delta 4-7$ | $\Delta 2-7$ |              |              | $\Delta 2-3$ | 3                   |
| #365    | $\Delta 4-7$ | $\Delta 2-7$ | $\Delta 4-8$ |              |              | 3                   |
| #395    | $\Delta 4-7$ | $\Delta 2-7$ | $\Delta 4-8$ |              |              | 3                   |
| #461    | $\Delta 4-7$ | $\Delta 2-7$ |              | $\Delta 2-8$ |              | 3                   |
| #470    | $\Delta 4-7$ | $\Delta 2-7$ | $\Delta 4-8$ | $\Delta 2-8$ |              | 4                   |

**Supplementary Table 8: Characteristics of patients according to *IKZF1* status**

|                        | mutation    | wild-type   | P                           |
|------------------------|-------------|-------------|-----------------------------|
| <b>Sex</b>             |             |             |                             |
| Male                   | 72 (56.3%)  | 213 (60.2%) | 0.4636<br>(Fisher)          |
| Female                 | 56 (43.7%)  | 141 (39.8%) |                             |
| <b>Age</b>             |             |             |                             |
| 15-25                  | 49 (38.3%)  | 123 (34.7%) | 0.3843<br>(X <sup>2</sup> ) |
| 26-35                  | 26 (20.3%)  | 71 (20.1%)  |                             |
| 36-45                  | 17 (13.3%)  | 61 (17.2%)  |                             |
| 46-55                  | 19 (14.8%)  | 68 (19.2%)  |                             |
| 56-65                  | 17 (13.3%)  | 31 (8.8%)   |                             |
| <b>Immunophenotype</b> |             |             |                             |
| pre B ALL              | 19 (14.8%)  | 92 (26.0%)  | 0.0064<br>(X <sup>2</sup> ) |
| common ALL             | 98 (76.6%)  | 216 (61.0%) |                             |
| pro B ALL              | 11 (8.6%)   | 46 (13.0%)  |                             |
| <b>WBC</b>             |             |             |                             |
| <30/nl                 | 79 (62.7%)  | 229 (65.6%) | 0.5869<br>(Fisher)          |
| >30/nl                 | 47 (37.3%)  | 120 (34.4%) |                             |
| Missing values         | 7           |             |                             |
| <b>Risk group</b>      |             |             |                             |
| Standard Risk          | 67 (52.3%)  | 201 (56.8%) | 0.4074<br>(Fisher)          |
| High Risk              | 61 (47.7%)  | 153 (43.2%) |                             |
| <b>CNS involvement</b> |             |             |                             |
| No                     | 100 (94.4%) | 272 (94.4%) | 1.0000<br>(Fisher)          |
| Yes                    | 6 (5.6%)    | 16 (5.6%)   |                             |
| Missing values         | 88          |             |                             |
| <b>Clinical course</b> |             |             |                             |
| CR                     | 114 (89.1%) | 314 (88.7%) | 0.9936<br>(X <sup>2</sup> ) |
| ED                     | 8 (6.2%)    | 23 (6.5%)   |                             |
| Failure                | 6 (4.7%)    | 17 (4.8%)   |                             |

**Supplementary Table 9: Characteristics of patients according to different *IKZF1* deletion types**

|                        | dominant-negative only | both forms of deletion | loss-of-function only | wild-type   | P (X <sup>2</sup> ) |
|------------------------|------------------------|------------------------|-----------------------|-------------|---------------------|
| <b>Sex</b>             |                        |                        |                       |             |                     |
| Male                   | 30 (60.0%)             | 16 (72.7%)             | 26 (46.43%)           | 213 (60.2%) | 0.1330              |
| Female                 | 20 (40.0%)             | 6 (27.3%)              | 30 (53.57%)           | 141 (39.8%) |                     |
| <b>Age</b>             |                        |                        |                       |             |                     |
| 15-25                  | 22 (44.0%)             | 7 (31.8%)              | 20 (35.7%)            | 123 (34.7%) | 0.5485              |
| 26-35                  | 8 (16.0%)              | 7 (31.8%)              | 11 (19.6%)            | 71 (20.1%)  |                     |
| 36-45                  | 6 (12.0%)              | 2 (9.1%)               | 9 (16.1%)             | 61 (17.2%)  |                     |
| 46-55                  | 6 (12.0%)              | 2 (9.1%)               | 11 (19.6%)            | 68 (19.2%)  |                     |
| 56-65                  | 8 (16.0%)              | 4 (18.2%)              | 5 (8.9%)              | 31 (8.8%)   |                     |
| <b>Immunophenotype</b> |                        |                        |                       |             |                     |
| pre-B                  | 6 (12,0%)              | 5 (22.7%)              | 8 (14.3%)             | 92 (26.0%)  | 0.0781              |
| Common                 | 39 (78,0%)             | 15 (68.2%)             | 44 (78.6%)            | 216 (61.0%) |                     |
| pro-B                  | 5 (10,0%)              | 2 (9.1%)               | 4 (7.1%)              | 46 (13.0%)  |                     |
| <b>WBC</b>             |                        |                        |                       |             |                     |
| <30/nl                 | 34 (68.0%)             | 14 (63.6%)             | 31 (57.4%)            | 229 (65.6%) | 0.6518              |
| >30/nl                 | 16 (32.0%)             | 8 (36.4%)              | 23 (42.6%)            | 120 (34.4%) |                     |
| Missing values         | n=7                    |                        |                       |             |                     |
| <b>Risk group</b>      |                        |                        |                       |             |                     |
| Standard Risk          | 29 (58.0%)             | 12 (54.5%)             | 26 (46.4%)            | 201 (56.8%) | 0.5252              |
| High Risk              | 21 (42.0%)             | 10 (45.5%)             | 30 (53.6%)            | 153 (43.2%) |                     |
| <b>CNS involvement</b> |                        |                        |                       |             |                     |
| No                     | 41 (95.4%)             | 16 (100%)              | 43 (91.5%)            | 272 (94.4%) | 0.6190              |
| Yes                    | 2 (4.6%)               | 0                      | 4 (8.5%)              | 16 (5.6%)   |                     |
| Missing values         | n=88                   |                        |                       |             |                     |
| <b>Clinical course</b> |                        |                        |                       |             |                     |
| CR                     | 45 (90.0%)             | 20 (90.9%)             | 49 (87.5%)            | 314 (88.7%) | 0.9042              |

**Supplementary Table 10:** Sequence of all breakpoints with accession numbers

| del  | accession number | patient      | proximal breakpoint | proximal sequence                               | insert   | distal sequence                                  | distal breakpoint |
|------|------------------|--------------|---------------------|-------------------------------------------------|----------|--------------------------------------------------|-------------------|
| Δ2   | LN875583         | #119         | 50.312.112          | GCACAGCTCTGACCATGCATGAAGTCCCTCTGAAATCGGTAAG     |          | CTGAACANAAAGCTCCAAGATGAAATTAGTTTTACTGTAAACTTCA   | 50.319.280        |
| Δ2-3 | LN875584         | #36          | 50.305.636          | GGCACAGCTTTCAAATGCAGCTTCCCTCTCTAGGGACTGCAG      | GGGGGA   | CATTTGCACATGTACATACACATGTACACACGTGCACACGTGGTCACT | 50.359.627        |
| Δ2-3 | LN875585         | #46          | 50.306.999          | GAAATAAATCCATGTGCATATGCACATATGCACACAGAGCGTG     | AGAAGG   | TATTGGGAGTAGATTAACCATTATGAAATTGGATTTTTAATTTTA    | 50.351.221        |
| Δ2-3 | LN875586         | #58          | 50.307.772          | AAGGGCACATGTACATTTTTGATCTAGGTCTTAGAAACGTAGAG    | CCCC     | GAATTCGGTGTTCGAAGGCTTACACTTTGATGCCAAGACTGCACAAG  | 50.366.344        |
| Δ2-3 | LN875587         | #113         | 50.307.794          | TCTAGGTCTTAGAAACGTAGAGTTTCAGAGGATCAGCATTATAC    | GGG      | CGTCACTTTAACAGTCACTGAGCTGTGACTCTTGGGGAAAGATTGTG  | 50.367.267        |
| Δ2-3 | LN875588         | #118         | 50.305.920          | TAAGGCCAGGTTCAATTTGGTTATGAGTCGAGGGGTGGGGGGGA    | GGG      | ACAGTGTGGTGTTCAGAGGCATAGGCTCTAGGCTCCCTGGCAGCACTG | 50.332.955        |
| Δ2-3 | LN875589         | #143         | 50.308.978          | TTGCATGGATTGGAATAGCCATTGTGTTCTTCCGTCTTCCCTGC    | CTTATGG  | GGTGTTCAGAGGCATAGGCTCTAGGCTCCCTGGCAGCACTGAGAGATA | 50.332.962        |
| Δ2-3 | LN875590         | #157         | 50.308.981          | CATGGATTGGAATAGCCATTGTGTTCTTCCGTCTTCCCTGCTGG    | CTCCAAAG | GGTATTGGTGTCTCTCTTCTCTCCCACTCTCCCAAGTGTGGAATTG   | 50.369.485        |
| Δ2-3 | LN875591         | #174         | 50.310.862          | TAATTGTTACCAAGCCATTGATGCTTCTATTCTTCCCTTTGCC     | ACCCTGGG | GAGCTAATAGCTGTACCCTAAATGATCCTGGCTTTGAATTCTTATC   | 50.352.225        |
| Δ2-3 | LN875592         | #199         | 50.306.409          | TGAACTAAATGGTCATGTTTTCTTCCCTTTTGTTCACGGTGA      | A        | CCCACAGTGAATTACCACCTTACTAAAATATTCATGGGTATATACTAT | 50.345.195        |
| Δ2-3 | LN875593         | #204         | 50.306.408          | TTGAACTAAATGGTCATGTTTTCTTCCCTTTTGTTCACGGTG      | GGGG     | CCACAGTGAATTACCACCTTACTAAAATATTCATGGGTATATACTATG | 50.345.196        |
| Δ2-3 | LN875594         | #215         | 50.307.794          | TCTAGGTCTTAGAAACGTAGAGTTTCAGAGGATCAGCATTATAC    | GA       | AAGTGGGAAGTGTCTTGACAGAATTCGGTGTTCGAAGGCTTACACTTT | 50.366.324        |
| Δ2-3 | LN875595         | #256         | 50.307.793          | ATCTAGGTCTTAGAAACGTAGAGTTTCAGAGGATCAGCATTATA    | GG       | CGTCACTTTAACAGTCACTGAGCTGTGACTCTTGGGGAAAGATTGTG  | 50.367.267        |
| Δ2-3 | LN875596         | #257         | 50.307.788          | TTTTGATCTAGGTCTTAGAAACGTAGAGTTTCAGAGGATCAGCA    | CCCCCCCG | GTCAGTGTGACTCTTGGGGAAAGATTGTGCGTGTGTGTGTGT       | 50.367.280        |
| Δ2-3 | LN875597         | #266         | 50.305.919          | TTAAGGCCAGGTTCAATTTGGTTATGAGTCGAGGGGTGGGGGGG    | CCTTA    | GCTATATCAGATAACATCTTGTACTAGGTTTTGGAATAGACGGGTGAG | 50.334.210        |
| Δ2-3 | LN875598         | #304         | 50.306.927          | TCTCTATATATAATGTACTTATACACACACTTC               | CACC     | GCTGGCTCCTAGAGTGCAGGAGCTCTCAGTACTGCTGTGCATACTC   | 50.364.747        |
| Δ2-3 | LN875599         | #327         | 50.306.408          | TTGAACTAAATGGTCATGTTTTCTTCCCTTTTGTTCACGGTG      |          | CACAGTGAATTACCACCTTACTAAAATATTCATGGGTATATACTATGG | 50.345.197        |
| Δ2-3 | LN875600         | #351         | 50.307.787          | TTTTGATCTAGGTCTTAGAAACGTAGAGTTTCAGAGGATCAGC     | CCCTTCAA | CACTGAGCTGTGACTCTTGGGGAAAGATTGTGCGTGTGTGTGTGT    | 50.367.282        |
| Δ2-3 | LN875601         | #443         | 50.308.968          | TTTCTTTGTGTGCTTGCATGGATTGGAATAGCCATTGTGTTCTTCCG | CCTTCTCC | CAAGGACAGAGTACTGCTTTCAGCCACCATTTGTCCAATGAGTGGCTG | 50.373.025        |
| Δ2-7 | LN875602         | #29 clone 1  | 50.307.794          | GATCTAGGTCTTAGAAACGTAGAGTTTCAGAGGATCAGCATTATAC  | C        | ACATCAAGTCTAGTGAAGTGTCTTCTTCAAGGT                | 50.395.935        |
| Δ2-7 | LN875603         | #29 clone 2  | 50.307.785          | GATCTAGGTCTTAGAAACGTAGAGTTTCAGAGGATCA           | CCC      | CAAGTCTAGTGAAGTGTCTTCTTCAAGGT                    | 50.395.939        |
| Δ2-7 | LN875604         | #36          | 50.307.792          | GATCTAGGTCTTAGAAACGTAGAGTTTCAGAGGATCAGCATTAT    | TCC      | AAACATCAAGTCTAGTGAAGTGTCTTCTTCAAGGT              | 50.395.933        |
| Δ2-7 | LN875605         | #50          | 50.307.790          | GATCTAGGTCTTAGAAACGTAGAGTTTCAGAGGATCAGCATT      | CCTGGGG  | ACATCAAGTCTAGTGAAGTGTCTTCTTCAAGGT                | 50.395.935        |
| Δ2-7 | LN875606         | #85          | 50.305.725          | CCACTCACAATTTCCCACTGCGCCGAGGCAGTATATTTAGCT      | GGGG     | ACATCAAGTCTAGTGAAGTGTCTTCTTCAAGGT                | 50.395.935        |
| Δ2-7 | LN875607         | #100         | 50.307.773          | GATCTAGGTCTTAGAAACGTAGAGT                       | CAGAG    | ACATCAAGTCTAGTGAAGTGTCTTCTTCAAGGT                | 50.395.935        |
| Δ2-7 | LN875608         | #108         | 50.307.792          | GATCTAGGTCTTAGAAACGTAGAGTTTCAGAGGATCAGCATTAT    | TAC      | GAAACATCAAGTCTAGTGAAGTGTCTTCTTCAAGGT             | 50.395.932        |
| Δ2-7 | LN875609         | #111 clone 1 | 50.307.778          | GATCTAGGTCTTAGAAACGTAGAGTTTCAG                  | GGG      | GGT                                              | 50.395.968        |
| Δ2-7 | LN875610         | #111 clone 2 | 50.307.791          | GATCTAGGTCTTAGAAACGTAGAGTTTCAGAGGATCAGCATTAT    | CCCCT    | GAAACATCAAGTCTAGTGAAGTGTCTTCTTCAAGGT             | 50.395.932        |
| Δ2-7 | LN875611         | #112         | 50.307.773          | GATCTAGGTCTTAGAAACGTAGAGT                       | GGGGAG   | GTTTCTTCTTCAAGGT                                 | 50.395.955        |

|      |          |                 |            |                                                |                 |                                         |            |
|------|----------|-----------------|------------|------------------------------------------------|-----------------|-----------------------------------------|------------|
| Δ2-7 | LN875612 | #113            | 50.307.791 | GATCTAGGTCCTAGAAACGTAGAGTTTCAGAGGATCAGCATT     | NNNNNNNNNNNN    | GTCTAGTGTAACTGTTTCTTCTTCAAGGT           | 50.395.942 |
| Δ2-7 | LN875613 | #126            | 50.307.794 | GATCTAGGTCCTAGAAACGTAGAGTTTCAGAGGATCAGCATTATAC | CCCTAGG         | GTCTAGTGTAACTGTTTCTTCTTCAAGGT           | 50.395.942 |
| Δ2-7 | LN875614 | #130            | 50.307.781 | GATCTAGGTCCTAGAAACGTAGAGTTTCAGAGG              | CTCGAGGGG       | AGTCTAGTGTAACTGTTTCTTCTTCAAGGT          | 50.395.941 |
| Δ2-7 | LN875615 | #133            | 50.307.791 | GATCTAGGTCCTAGAAACGTAGAGTTTCAGAGGATCAGCATT     | NNNNNNNNNNNN    | ATCAAGTCTAGTGTAACTGTTTCTTCTTCAAGGT      | 50.395.937 |
| Δ2-7 | LN875616 | #147            | 50.307.785 | GATCTAGGTCCTAGAAACGTAGAGTTTCAGAGGATCA          | CCCCGAG         | ACATCAAGTCTAGTGTAACTGTTTCTTCTTCAAGGT    | 50.395.935 |
| Δ2-7 | LN875617 | #154            | 50.307.788 | GATCTAGGTCCTAGAAACGTAGAGTTTCAGAGGATCAGCA       | CCCCTGGGATCA    | CTAGTGTAACTGTTTCTTCTTCAAGGT             | 50.395.944 |
| Δ2-7 | LN875618 | #157            | 50.307.785 | GATCTAGGTCCTAGAAACGTAGAGTTTCAGAGGATCA          | GCCGT           | CATCAAGTCTAGTGTAACTGTTTCTTCTTCAAGGT     | 50.395.936 |
| Δ2-7 | LN875619 | #175            | 50.307.792 | GATCTAGGTCCTAGAAACGTAGAGTTTCAGAGGATCAGCATTAT   | TTAA            | GAAACATCAAGTCTAGTGTAACTGTTTCTTCTTCAAGGT | 50.395.932 |
| Δ2-7 | LN875620 | #178            | 50.307.787 | GATCTAGGTCCTAGAAACGTAGAGTTTCAGAGGATCAGC        | TTCCC           | ACATCAAGTCTAGTGTAACTGTTTCTTCTTCAAGGT    | 50.395.935 |
| Δ2-7 | LN875621 | #189<br>clone 1 | 50.307.784 | GATCTAGGTCCTAGAAACGTAGAGTTTCAGAGGATC           | TCGCCGG         | AGTCTAGTGTAACTGTTTCTTCTTCAAGGT          | 50.395.941 |
| Δ2-7 | LN875622 | #189<br>clone 2 | 50.307.787 | GATCTAGGTCCTAGAAACGTAGAGTTTCAGAGGATCAGC        | AGGCG           | GAAACATCAAGTCTAGTGTAACTGTTTCTTCTTCAAGGT | 50.395.931 |
| Δ2-7 | LN875623 | #198            | 50.307.788 | GATCTAGGTCCTAGAAACGTAGAGTTTCAGAGGATCAGCA       | CCT             | TAGTGTAACTGTTTCTTCTTCAAGGT              | 50.395.945 |
| Δ2-7 | LN875624 | #199            | 50.306.409 | TGAACTAAATGGTCATGTTTTCTCCCTTTTGTTCACGGTGA      | NNNNNNNNNNNN    | ACATCAAGTCTAGTGTAACTGTTTCTTCTTCAAGGT    | 50.395.935 |
| Δ2-7 | LN875625 | #204            | 50.307.784 | GATCTAGGTCCTAGAAACGTAGAGTTTCAGAGGATC           | CGGGGG          | CTAGTGTAACTGTTTCTTCTTCAAGGT             | 50.395.944 |
| Δ2-7 | LN875626 | #210            | 50.307.782 | GATCTAGGTCCTAGAAACGTAGAGTTTCAGAGGA             | NNNNNNNNNNNNNG  | CTAGTGTAACTGTTTCTTCTTCAAGGT             | 50.395.944 |
| Δ2-7 | LN875627 | #215<br>clone 1 | 50.307.784 | GATCTAGGTCCTAGAAACGTAGAGTTTCAGAGGATC           | GATTCTC         | AAACATCAAGTCTAGTGTAACTGTTTCTTCTTCAAGGT  | 50.395.933 |
| Δ2-7 | LN875628 | #215<br>clone 2 | 50.307.785 | GATCTAGGTCCTAGAAACGTAGAGTTTCAGAGGATCA          | CCATAG          | GTGTAAGTGTCTTCTTCTTCAAGGT               | 50.395.947 |
| Δ2-7 | LN875629 | #217            | 50.307.789 | GATCTAGGTCCTAGAAACGTAGAGTTTCAGAGGATCAGCAT      | CCC             | GAAACATCAAGTCTAGTGTAACTGTTTCTTCTTCAAGGT | 50.395.932 |
| Δ2-7 | LN875630 | #221            | 50.307.361 | ATGTTGGTCTGTGCATATTCTAAGGGAGATTGATGTAAGTGGC    | CCTAGGGGG       | ACATCAAGTCTAGTGTAACTGTTTCTTCTTCAAGGT    | 50.395.935 |
| Δ2-7 | LN875631 | #226            | 50.307.766 | GATCTAGGTCCTAGAAAC                             | TCGCCGG         | CATCAAGTCTAGTGTAACTGTTTCTTCTTCAAGGT     | 50.395.936 |
| Δ2-7 | LN875632 | #243            | 50.307.790 | GATCTAGGTCCTAGAAACGTAGAGTTTCAGAGGATCAGCATT     | CTCCCC          | AAACATCAAGTCTAGTGTAACTGTTTCTTCTTCAAGGT  | 50.395.933 |
| Δ2-7 | LN875633 | #256            | 50.307.793 | GATCTAGGTCCTAGAAACGTAGAGTTTCAGAGGATCAGCATTATA  | ATCCCCAC        | GAAACATCAAGTCTAGTGTAACTGTTTCTTCTTCAAGGT | 50.395.932 |
| Δ2-7 | LN875634 | #266            | 50.307.790 | GATCTAGGTCCTAGAAACGTAGAGTTTCAGAGGATCAGCATT     | CCACAGGG        | CATCAAGTCTAGTGTAACTGTTTCTTCTTCAAGGT     | 50.395.936 |
| Δ2-7 | LN875635 | #276            | 50.307.789 | GATCTAGGTCCTAGAAACGTAGAGTTTCAGAGGATCAGCAT      | CCCCATN         | TCAAGTCTAGTGTAACTGTTTCTTCTTCAAGGT       | 50.395.938 |
| Δ2-7 | LN875636 | #285            | 50.307.789 | GATCTAGGTCCTAGAAACGTAGAGTTTCAGAGGATCAGCAT      | NNNNNNNNNNNN    | CATCAAGTCTAGTGTAACTGTTTCTTCTTCAAGGT     | 50.395.936 |
| Δ2-7 | LN875637 | #291            | 50.305.733 | AATTTCCCACTGCGCCGAGGCAGTATATTTCAGCTTTGAGATA    | TCGGCCGGGGACG   | AGTGTAACTGTTTCTTCTTCAAGGT               | 50.395.946 |
| Δ2-7 | LN875638 | #307            | 50.307.788 | GATCTAGGTCCTAGAAACGTAGAGTTTCAGAGGATCAGCA       | CCCT            | AAACATCAAGTCTAGTGTAACTGTTTCTTCTTCAAGGT  | 50.395.933 |
| Δ2-7 | LN875639 | #316            | 50.307.779 | GATCTAGGTCCTAGAAACGTAGAGTTTCAGA                | AGCATTCCCTCGCGG | ACATCAAGTCTAGTGTAACTGTTTCTTCTTCAAGGT    | 50.395.935 |
| Δ2-7 | LN875640 | #329            | 50.307.788 | GATCTAGGTCCTAGAAACGTAGAGTTTCAGAGGATCAGCA       | NNNNNNNNNNNNNN  | ACATCAAGTCTAGTGTAACTGTTTCTTCTTCAAGGT    | 50.395.935 |
| Δ2-7 | LN875641 | #335            | 50.307.791 | GATCTAGGTCCTAGAAACGTAGAGTTTCAGAGGATCAGCATT     | A               | GAAACATCAAGTCTAGTGTAACTGTTTCTTCTTCAAGGT | 50.395.932 |
| Δ2-7 | LN875642 | #337            | 50.307.787 | GATCTAGGTCCTAGAAACGTAGAGTTTCAGAGGATCAGC        | CTTTCTTC        | TCAAGTCTAGTGTAACTGTTTCTTCTTCAAGGT       | 50.395.938 |
| Δ2-7 | LN875643 | #340            | 50.307.787 | GATCTAGGTCCTAGAAACGTAGAGTTTCAGAGGATCAGC        | NNNNNNNNNNNNNN  | CATCAAGTCTAGTGTAACTGTTTCTTCTTCAAGGT     | 50.395.936 |
| Δ2-7 | LN875644 | #349            | 50.307.790 | GATCTAGGTCCTAGAAACGTAGAGTTTCAGAGGATCAGCATT     | CGCCTTT         | AAACATCAAGTCTAGTGTAACTGTTTCTTCTTCAAGGT  | 50.395.933 |

|      |          |                 |            |                                                 |                 |                                                 |            |
|------|----------|-----------------|------------|-------------------------------------------------|-----------------|-------------------------------------------------|------------|
| Δ2-7 | LN875645 | #360            | 50.307.789 | GATCTAGGTCTTAGAAACGTAGAGTTTCAGAGGATCAGCAT       | CACGGGG         | AACATCAAGTCTAGTGTAAGTGTCTTCTTCAAGGT             | 50.395.934 |
| Δ2-7 | LN875646 | #365            | 50.307.788 | GATCTAGGTCTTAGAAACGTAGAGTTTCAGAGGATCAGCA        | CCCCAAG         | CATCAAGTCTAGTGTAAGTGTCTTCTTCAAGGT               | 50.395.936 |
| Δ2-7 | LN875647 | #395            | 50.307.787 | GATCTAGGTCTTAGAAACGTAGAGTTTCAGAGGATCAGC         | NNNNNNNN        | ATCAAGTCTAGTGTAAGTGTCTTCTTCAAGGT                | 50.395.937 |
| Δ2-7 | LN875648 | #410            | 50.307.793 | GATCTAGGTCTTAGAAACGTAGAGTTTCAGAGGATCAGCATTATA   |                 | GGAAACATCAAGTCTAGTGTAAGTGTCTTCTTCAAGGT          | 50.395.931 |
| Δ2-7 | LN875649 | #414            | 50.307.792 | GATCTAGGTCTTAGAAACGTAGAGTTTCAGAGGATCAGCATTAT    | NN              | GAAACATCAAGTCTAGTGTAAGTGTCTTCTTCAAGGT           | 50.395.932 |
| Δ2-7 | LN875650 | #432            | 50.307.794 | GATCTAGGTCTTAGAAACGTAGAGTTTCAGAGGATCAGCATTATAC  | CTGAGG          | CATCAAGTCTAGTGTAAGTGTCTTCTTCAAGGT               | 50.395.936 |
| Δ2-7 | LN875651 | #450            | 50.307.795 | GATCTAGGTCTTAGAAACGTAGAGTTTCAGAGGATCAGCATTATACA | GG              | ACATCAAGTCTAGTGTAAGTGTCTTCTTCAAGGT              | 50.395.935 |
| Δ2-7 | LN875652 | #454            | 50.307.789 | GATCTAGGTCTTAGAAACGTAGAGTTTCAGAGGATCAGCAT       | CTCCCC          | GAAACATCAAGTCTAGTGTAAGTGTCTTCTTCAAGGT           | 50.395.932 |
| Δ2-7 | LN875653 | #461            | 50.307.789 | GATCTAGGTCTTAGAAACGTAGAGTTTCAGAGGATCAGCAT       | NNNNNNNNNNNNNN  | AGTGTAAGTGTCTTCTTCAAGGT                         | 50.395.946 |
| Δ2-7 | LN875654 | #470<br>clone 1 | 50.307.785 | GATCTAGGTCTTAGAAACGTATAGTTTCAAAGGATCA           | NCCTCCC         | AACATCAAGTCTAGTGTAAGTGTCTTCTTCAAGGT             | 50.395.934 |
| Δ2-7 | LN875655 | #470<br>clone 2 | 50.307.766 | GATCTAGGTCTTAGAAAC                              | CCATGG          | GTGTAAGTGTCTTCTTCAAGGT                          | 50.395.947 |
| Δ2-8 | LN875656 | #1              | 50.307.793 | GATCTAGGTCTTAGAAACGTAGAGTTTCAGAGGATCAGCATTATA   | GAA             | GGGCTGACATGCTGGCTCTCTCCCTGTATGCCGAGACATGCTTGGG  | 50.416.755 |
| Δ2-8 | LN875657 | #12             | 50.307.766 | GATCTAGGTCTTAGAAAC                              | AGGGCGCTGCGACAT | TGCTGGCTCTCTCCCTGTATGCCGAGACATGCTTGGG           | 50.416.764 |
| Δ2-8 | LN875658 | #99             | 50.307.778 | GATCTAGGTCTTAGAAACGTAGAGTTTCAG                  | CCTCCCG         | GGGTCTACGTGGAATAGTGCTTTCCACAGAGTAGCTACTAGCCACAC | 50.416.223 |
| Δ2-8 | LN875659 | #104            | 50.307.790 | GATCTAGGTCTTAGAAACGTAGAGTTTCAGAGGATCAGCATT      | CCCA            | TGGGCTGACATGCTGGCTCTCTCCCTGTATGCCGAGACATGCTTGGG | 50.416.754 |
| Δ2-8 | LN875660 | #160            | 50.307.787 | GATCTAGGTCTTAGAAACGTAGAGTTTCAGAGGATCAGC         | CCCGGGGA        | TGGCTCTCTCCCTGTATGCCGAGACATGCTTGGG              | 50.416.767 |
| Δ2-8 | LN875661 | #458            | 50.307.784 | GATCTAGGTCTTAGAAACGTAGAGTTTCAGAGGATC            | CCTTCCCGGGG     | GCTGGCTCTCTCCCTGTATGCCGAGACATGCTTGGG            | 50.416.765 |
| Δ2-8 | LN875662 | #461<br>clone 1 | 50.307.787 | GATCTAGGTCTTAGAAACGTAGAGTTTCAGAGGATCAGC         | CCCTGGGG        | TGCTGGCTCTCTCCCTGTATGCCGAGACATGCTTGGG           | 50.416.764 |
| Δ2-8 | LN875663 | #461<br>clone 2 | 50.307.787 | GATCTAGGTCTTAGAAACGTAGAGTTTCAGAGGATCAGC         | CCTA            | TGGGCTGACATGCTGGCTCTCTCCCTGTATGCCGAGACATGCTTGGG | 50.416.754 |
| Δ2-8 | LN875664 | #464            | 50.307.789 | GATCTAGGTCTTAGAAACGTAGAGTTTCAGAGGATCAGCAT       | CATGG           | GGGCTGACATGCTGGCTCTCTCCCTGTATGCCGAGACATGCTTGGG  | 50.416.755 |
| Δ2-8 | LN875665 | #482            | 50.307.787 | GATCTAGGTCTTAGAAACGTAGAGTTTCAGAGGATCAGC         | CGGGGA          | TGGGCTGACATGCTGGCTCTCTCCCTGTATGCCGAGACATGCTTGGG | 50.416.754 |
| Δ4-7 | LN875666 | #7              | 50.345.193 | GAATTGACGGCATCCAGGGATCTCAGAAATTATTAGTACA        | CCCT            | ACATCAAGTCTAGTGTAAGTGTCTTCTTCAAGGT              | 50.395.935 |
| Δ4-7 | LN875667 | #17             | 50.345.192 | GAATTGACGGCATCCAGGGATCTCAGAAATTATTAGTAC         | NNNNNNNNNN      | ATCAAGTCTAGTGTAAGTGTCTTCTTCAAGGT                | 50.395.937 |
| Δ4-7 | LN875668 | #20             | 50.345.194 | GAATTGACGGCATCCAGGGATCTCAGAAATTATTAGTACAT       | NNNNCNAGGN      | ATCAAGTCTAGTGTAAGTGTCTTCTTCAAGGT                | 50.395.937 |
| Δ4-7 | LN875669 | #25             | 50.345.196 | GAATTGACGGCATCCAGGGATCTCAGAAATTATTAGTACATCC     | GGGGG           | AACATCAAGTCTAGTGTAAGTGTCTTCTTCAAGGT             | 50.395.934 |
| Δ4-7 | LN875670 | #29             | 50.345.193 | GAATTGACGGCATCCAGGGATCTCAGAAATTATTAGTACA        | CCCCTAG         | GTCTAGTGTAAGTGTCTTCTTCAAGGT                     | 50.395.942 |
| Δ4-7 | LN875671 | #40             | 50.345.196 | GAATTGACGGCATCCAGGGATCTCAGAAATTATTAGTACATCC     | AGG             | CATCAAGTCTAGTGTAAGTGTCTTCTTCAAGGT               | 50.395.936 |
| Δ4-7 | LN875672 | #58             | 50.345.195 | GAATTGACGGCATCCAGGGATCTCAGAAATTATTAGTACATC      |                 | GAAACATCAAGTCTAGTGTAAGTGTCTTCTTCAAGGT           | 50.395.932 |
| Δ4-7 | LN875673 | #80             | 50.345.196 | GAATTGACGGCATCCAGGGATCTCAGAAATTATTAGTACATCC     | GAT             | CATCAAGTCTAGTGTAAGTGTCTTCTTCAAGGT               | 50.395.936 |

|      |          |                 |            |                                              |                                                                                                                                                                                                                                                                               |                                              |            |
|------|----------|-----------------|------------|----------------------------------------------|-------------------------------------------------------------------------------------------------------------------------------------------------------------------------------------------------------------------------------------------------------------------------------|----------------------------------------------|------------|
| Δ4-7 | LN875674 | #87             | 50.345.192 | GAATTGACGGCATCCAGGGATCTCAGAAATTATTAGTAC      | CCCTTCGTCCCGGC<br>CCGTTTTGTGTGGG<br>TTGAATCGTAGCCAC<br>TATATCCACCACAGT<br>CTGACATCGCCTGAC<br>AATAACCACACCTGG<br>AACTGGAGGCGGGG<br>CTGTCAGGAGGAG<br>CTTCCCAGGGAACA<br>GGGAGGGTCCAGAC<br>AGCTGAGCCAGGGG<br>CCCCAGGACTGGG<br>GACGTGGGGGGCT<br>GCTTAGGTACCAGAC<br>ATGGCCTCCCATCGG | GTCTAGTGTAACTGTTTCTTCTTCAAGGT                | 50.395.942 |
| Δ4-7 | LN875675 | #88             | 50.345.192 | GAATTGACGGCATCCAGGGATCTCAGAAATTATTAGTAC      | TCTTCCC                                                                                                                                                                                                                                                                       | GAAACATCAAGTCTAGTGTAACTGTTTCTTCTTCAAGGT      | 50.395.932 |
| Δ4-7 | LN875676 | #100            | 50.345.186 | GAATTGACGGCATCCAGGGATCTCAGAAATTAT            | AGGG                                                                                                                                                                                                                                                                          | TCAAGTCTAGTGTAACTGTTTCTTCTTCAAGGT            | 50.395.938 |
| Δ4-7 | LN875677 | #103            | 50.345.195 | GAATTGACGGCATCCAGGGATCTCAGAAATTATTAGTACATC   | GGG                                                                                                                                                                                                                                                                           | ATCAAGTCTAGTGTAACTGTTTCTTCTTCAAGGT           | 50.395.937 |
| Δ4-7 | LN875678 | #108            | 50.345.195 | GAATTGACGGCATCCAGGGATCTCAGAAATTATTAGTACATC   | GGG                                                                                                                                                                                                                                                                           | ACATCAAGTCTAGTGTAACTGTTTCTTCTTCAAGGT         | 50.395.935 |
| Δ4-7 | LN875679 | #110            | 50.345.193 | GAATTGACGGCATCCAGGGATCTCAGAAATTATTAGTACA     | GAGGGG                                                                                                                                                                                                                                                                        | ACATCAAGTCTAGTGTAACTGTTTCTTCTTCAAGGT         | 50.395.935 |
| Δ4-7 | LN875680 | #111            | 50.345.195 | GAATTGACGGCATCCAGGGATCTCAGAAATTATTAGTACATC   | NNNN                                                                                                                                                                                                                                                                          | ATCAAGTCTAGTGTAACTGTTTCTTCTTCAAGGT           | 50.395.937 |
| Δ4-7 | LN875681 | #113            | 50.345.193 | GAATTGACGGCATCCAGGGATCTCAGAAATTATTAGTACA     | CCCA                                                                                                                                                                                                                                                                          | GAAACATCAAGTCTAGTGTAACTGTTTCTTCTTCAAGGT      | 50.395.932 |
| Δ4-7 | LN875682 | #116            | 50.345.167 | GAATTGACGGCATC                               | AGTTGCGGGAGC                                                                                                                                                                                                                                                                  | CAAGTCTAGTGTAACTGTTTCTTCTTCAAGGT             | 50.395.939 |
| Δ4-7 | LN875683 | #121            | 50.345.190 | GAATTGACGGCATCCAGGGATCTCAGAAATTATTAGT        | TCTCTTC                                                                                                                                                                                                                                                                       | GAAACATCAAGTCTAGTGTAACTGTTTCTTCTTCAAGGT      | 50.395.932 |
| Δ4-7 | LN875684 | #126            | 50.345.196 | GAATTGACGGCATCCAGGGATCTCAGAAATTATTAGTACATCC  |                                                                                                                                                                                                                                                                               | TCAAGTCTAGTGTAACTGTTTCTTCTTCAAGGT            | 50.395.938 |
| Δ4-7 | LN875685 | #127            | 50.345.196 | GAATTGACGGCATCCAGGGATCTCAGAAATTATTAGTACATCC  |                                                                                                                                                                                                                                                                               | AAACATCAAGTCTAGTGTAACTGTTTCTTCTTCAAGGT       | 50.395.933 |
| Δ4-7 | LN875686 | #133            | 50.345.195 | GAATTGACGGCATCCAGGGATCTCAGAAATTATTAGTACATC   | GACCTTCCTAGT<br>GCCCAGCGGGGT<br>GGGAAAGGT                                                                                                                                                                                                                                     | ACATCAAGTCTAGTGTAACTGTTTCTTCTTCAAGGT         | 50.395.935 |
| Δ4-7 | LN875687 | #138            | 50.345.175 | GAATTGACGGCATCCAGGGATC                       | CCTGTCCAA                                                                                                                                                                                                                                                                     | GCTGTGGAACATCAAGTCTAGTGTAACTGTTTCTTCTTCAAGGT | 50.395.926 |
| Δ4-7 | LN875688 | #142            | 50.345.196 | GAATTGATGGCATCCAGGGATCTCAGAAATTATTAGTACATCC  | TGCGGGTGGCC<br>GGGA                                                                                                                                                                                                                                                           | TCGAAACATCAAGTCTAGTGTAACTGTTTCTTCTTCAAGGT    | 50.395.930 |
| Δ4-7 | LN875689 | #146<br>clone 1 | 50.345.196 | GAATTGACGGCATCCAGGGATCTCAGAAATTATTAGTACATCC  |                                                                                                                                                                                                                                                                               | ACATCAAGTCTAGTGTAACTGTTTCTTCTTCAAGGT         | 50.395.935 |
| Δ4-7 | LN875690 | #146<br>clone 2 | 50.345.196 | GAATTGACGGCATCCAGGGATCTCAGAAATTATTAGTACATCC  | CC                                                                                                                                                                                                                                                                            | ACATCAAGTCTAGTGTAACTGTTTCTTCTTCAAGGT         | 50.395.935 |
| Δ4-7 | LN875691 | #148            | 50.345.196 | GAATTGACGGCATCCAGGGATCTCAGAAATTATTAGTACATCC  | GAGTGGG                                                                                                                                                                                                                                                                       | CATCAAGTCTAGTGTAACTGTTTCTTCTTCAAGGT          | 50.395.936 |
| Δ4-7 | LN875692 | #170            | 50.345.192 | GAATTGACGGCATCCAGGGATCTCAGAAATTATTAGTAC      | GCC                                                                                                                                                                                                                                                                           | GGAAACATCAAGTCTAGTGTAACTGTTTCTTCTTCAAGGT     | 50.395.931 |
| Δ4-7 | LN875693 | #174            | 50.345.197 | GAATTGACGGCATCCAGGGATCTCAGAAATTATTAGTACATCCC | G                                                                                                                                                                                                                                                                             | GGAAACATCAAGTCTAGTGTAACTGTTTCTTCTTCAAGGT     | 50.395.931 |
| Δ4-7 | LN875694 | #175            | 50.345.196 | GAATTGACGGCATCCAGGGATCTCAGAAATTATTAGTACATCC  |                                                                                                                                                                                                                                                                               | AAACATCAAGTCTAGTGTAACTGTTTCTTCTTCAAGGT       | 50.395.933 |
| Δ4-7 | LN875695 | #179            | 50.345.197 | GAATTGACGGCATCCAGGGATCTCAGAAATTATTAGTACATCCC | CC                                                                                                                                                                                                                                                                            | GAAACATCAAGTCTAGTGTAACTGTTTCTTCTTCAAGGT      | 50.395.932 |
| Δ4-7 | LN875696 | #186            | 50.345.196 | GAATTGACGGCATCCAGGGATCTCAGAAATTATTAGTACATCC  | GCCGCCCGCTG                                                                                                                                                                                                                                                                   | AACATCAAGTCTAGTGTAACTGTTTCTTCTTCAAGGT        | 50.395.934 |
| Δ4-7 | LN875697 | #197            | 50.345.196 | GAATTGACGGCATCCAGGGATCTCAGAAATTATTAGTACATCC  | GAC                                                                                                                                                                                                                                                                           | ACATCAAGTCTAGTGTAACTGTTTCTTCTTCAAGGT         | 50.395.935 |
| Δ4-7 | LN875698 | #198            | 50.345.196 | GAATTGACGGCATCCAGGGATCTCAGAAATTATTAGTACATCC  | AAACAGG                                                                                                                                                                                                                                                                       | CAAGTCTAGTGTAACTGTTTCTTCTTCAAGGT             | 50.395.939 |

|      |          |              |            |                                              |                |                                         |            |
|------|----------|--------------|------------|----------------------------------------------|----------------|-----------------------------------------|------------|
| Δ4-7 | LN875699 | #203         | 50.345.196 | GAATTGACGGCATCCAGGGATCTCAGAAATTATTAGTACATCC  | AAAC           | CATCAAGTCTAGTGTAAGTGTTCCTTCTTCAAGGT     | 50.395.936 |
| Δ4-7 | LN875700 | #205         | 50.345.194 | GAATTGACGGCATCCAGGGATCTCAGAAATTATTAGTACAT    | AGGG           | ACATCAAGTCTAGTGTAAGTGTTCCTTCTTCAAGGT    | 50.395.935 |
| Δ4-7 | LN875701 | #207         | 50.345.196 | GAATTGACGGCATCCAGGGATCTCAGAAATTATTAGTACATCC  | GGG            | TCAAGTCTAGTGTAAGTGTTCCTTCTTCAAGGT       | 50.395.938 |
| Δ4-7 | LN875702 | #217         | 50.345.195 | GAATTGACGGCATCCAGGGATCTCAGAAATTATTAGTACATC   | T              | AACATCAAGTCTAGTGTAAGTGTTCCTTCTTCAAGGT   | 50.395.934 |
| Δ4-7 | LN875703 | #233         | 50.345.181 | GAATTGACGGCATCCAGGGATCTCAGAA                 | CCCCGAACG      | AGTCTAGTGTAAGTGTTCCTTCTTCAAGGT          | 50.395.941 |
| Δ4-7 | LN875704 | #236         | 50.345.192 | GAATTGACGGCATCCAGGGATCTCAGAAATTATTAGTAC      |                | GAAACATCAAGTCTAGTGTAAGTGTTCCTTCTTCAAGGT | 50.395.932 |
| Δ4-7 | LN875705 | #257         | 50.345.192 | GAATTGACGGCATCCAGGGATCTCAGAAATTATTAGTAC      | TTT            | ACATCAAGTCTAGTGTAAGTGTTCCTTCTTCAAGGT    | 50.395.935 |
| Δ4-7 | LN875706 | #267         | 50.345.196 | GAATTGACGGCATCCAGGGATCTCAGAAATTATTAGTACATCC  | GGGAGGG        | ATCAAGTCTAGTGTAAGTGTTCCTTCTTCAAGGT      | 50.395.937 |
| Δ4-7 | LN875707 | #276         | 50.345.197 | GAATTGACGGCATCCAGGGATCTCAGAAATTATTAGTACATCCC | C              | CATCAAGTCTAGTGTAAGTGTTCCTTCTTCAAGGT     | 50.395.936 |
| Δ4-7 | LN875708 | #285         | 50.345.192 | GAATTGACGGCATCCAGGGATCTCAGAAATTATTAGTAC      | CCTCCCCACCAGAG | CATCAAGTCTAGTGTAAGTGTTCCTTCTTCAAGGT     | 50.395.936 |
| Δ4-7 | LN875709 | #295         | 50.345.192 | GAATTGACGGCATCCAGGGATCTCAGAAATTATTAGTAC      | CCAGAGCCGGG    | GTGTAAGTGTTCCTTCTTCAAGGT                | 50.395.947 |
| Δ4-7 | LN875710 | #320         | 50.345.197 | GAATTGACGGCATCCAGGGATCTCAGAAATTATTAGTACATCCC | TCGG           | AACATCAAGTCTAGTGTAAGTGTTCCTTCTTCAAGGT   | 50.395.934 |
| Δ4-7 | LN875711 | #335         | 50.345.189 | GAATTGACGGCATCCAGGGATCTCAGAAATTATTAG         | NNNNNNN        | AAACATCAAGTCTAGTGTAAGTGTTCCTTCTTCAAGGT  | 50.395.933 |
| Δ4-7 | LN875712 | #338 clone 1 | 50.345.195 | GAATTGACGGCATCCAGGGATCTCAGAAATTATTAGTACATC   | TGGTTCTC       | GAAACATCAAGTCTAGTGTAAGTGTTCCTTCTTCAAGGT | 50.395.932 |
| Δ4-7 | LN875713 | #338 clone 2 | 50.373.284 | TCCAATGCTTCCCTGCTGTTCTGCTCCCCACCTGCAAGCGCCCA | T              | ACATCAAGTCTAGTGTAAGTGTTCCTTCTTCAAGGT    | 50.395.935 |
| Δ4-7 | LN875714 | #342         | 50.345.196 | GAATTGACGGCATCCAGGGATCTCAGAAATTATTAGTACATCC  | GA             | GAAACATCAAGTCTAGTGTAAGTGTTCCTTCTTCAAGGT | 50.395.932 |
| Δ4-7 | LN875715 | #343         | 50.345.192 | GAATTGACGGCATCCAGGGATCTCAGAAATTATTAGTAC      | CCCC           | GAAACATCAAGTCTAGTGTAAGTGTTCCTTCTTCAAGGT | 50.395.932 |
| Δ4-7 | LN875716 | #345         | 50.345.196 | GAATTGACGGCATCCAGGGATCTCAGAAATTATTAGTACATCC  | G              | GGAACATCAAGTCTAGTGTAAGTGTTCCTTCTTCAAGGT | 50.395.931 |
| Δ4-7 | LN875717 | #355         | 50.345.196 | GAATTGACGGCATCCAGGGATCTCAGAAATTATTAGTACATCC  | NNNN           | CATCAAGTCTAGTGTAAGTGTTCCTTCTTCAAGGT     | 50.395.936 |
| Δ4-7 | LN875718 | #356         | 50.345.192 | GAATTGACGGCATCCAGGGATCTCAGAAATTATTAGTAC      | G              | GGAACATCAAGTCTAGTGTAAGTGTTCCTTCTTCAAGGT | 50.395.931 |
| Δ4-7 | LN875719 | #361         | 50.345.196 | GAATTGACGGCATCCAGGGATCTCAGAAATTATTAGTACATCC  | GGGG           | AACATCAAGTCTAGTGTAAGTGTTCCTTCTTCAAGGT   | 50.395.934 |
| Δ4-7 | LN875720 | #362         | 50.345.195 | GAATTGACGGCATCCAGGGATCTCAGAAATTATTAGTACATC   | GAAAGTCTGGGC   | GTAAGTGTTCCTTCTTCAAGGT                  | 50.395.949 |
| Δ4-7 | LN875721 | #365         | 50.345.193 | GAATTGACGGCATCCAGGGATCTCAGAAATTATTAGTACA     | CCCCAAGGGGG    | ACATCAAGTCTAGTGTAAGTGTTCCTTCTTCAAGGT    | 50.395.935 |
| Δ4-7 | LN875722 | #370         | 50.345.193 | GAATTGACGGCATCCAGGGATCTCAGAAATTATTAGTACA     | CGGGGCG        | ACATCAAGTCTAGTGTAAGTGTTCCTTCTTCAAGGT    | 50.395.935 |
| Δ4-7 | LN875723 | #376         | 50.345.188 | GAATTGACGGCATCCAGGGATCTCAGAAATTATTA          |                | AACATCAAGTCTAGTGTAAGTGTTCCTTCTTCAAGGT   | 50.395.934 |
| Δ4-7 | LN875724 | #395         | 50.345.192 | GAATTGATGGCATCCAGGGATCTCAGAAATTATTAGTAC      | NN             | TAGTGAAGTGTTCCTTCTTCAAGGT               | 50.395.945 |
| Δ4-7 | LN875728 | #400         | 50.345.192 | GAATTGACGGCATCCAGGGATCTCAGAAATTATTAGTAC      | TT             | AAACATCAAGTCTAGTGTAAGTGTTCCTTCTTCAAGGT  | 50.395.933 |
| Δ4-7 | LN875729 | #403         | 50.345.195 | GAATTGACGGCATCCAGGGATCTCAGAAATTATTAGTACATC   | GGGGACGA       | ATCAAGTCTAGTGTAAGTGTTCCTTCTTCAAGGT      | 50.395.937 |
| Δ4-7 | LN875727 | #405         | 50.345.192 | GAATTGACGGCATCCAGGGATCTCAGAAATTATTAGTAC      | CCGTCAGG       | GTGTAAGTGTTCCTTCTTCAAGGT                | 50.395.947 |
| Δ4-7 | LN875730 | #407         | 50.345.193 | GAATTGACGGCATCCAGGGATCTCAGAAATTATTAGTACA     | CCCC           | AAACATCAAGTCTAGTGTAAGTGTTCCTTCTTCAAGGT  | 50.395.933 |
| Δ4-7 | LN875731 | #414         | 50.345.196 | GAATTGACGGCATCCAGGGATCTCAGAAATTATTAGTACATCC  | GGCT           | AACATCAAGTCTAGTGTAAGTGTTCCTTCTTCAAGGT   | 50.395.934 |
| Δ4-7 | LN875732 | #417         | 50.345.196 | GAATTGACGGCATCCAGGGATCTCAGAAATTATTAGTACATCC  | GG             | AACATCAAGTCTAGTGTAAGTGTTCCTTCTTCAAGGT   | 50.395.934 |
| Δ4-7 | LN875733 | #425         | 50.345.197 | GAATTGACGGCATCCAGGGATCTCAGAAATTATTAGTACATCCC | CAG            | ACATCAAGTCTAGTGTAAGTGTTCCTTCTTCAAGGT    | 50.395.935 |
| Δ4-7 | LN875734 | #434         | 50.345.196 | GAATTGACGGCATCCAGGGATCTCAGAAATTATTAGTACATCC  | T              | AAACATCAAGTCTAGTGTAAGTGTTCCTTCTTCAAGGT  | 50.395.933 |



|      |          |                 |            |                                              |                |                                                  |            |
|------|----------|-----------------|------------|----------------------------------------------|----------------|--------------------------------------------------|------------|
| Δ4-7 | LN875725 | #437            | 50.345.197 | GAATTGACGGCATCCAGGGATCTCAGAAATTATTAGTACATCCC |                | GAAACATCAAGTCTAGTGTAACTGTTTCTTCTTCAAGGT          | 50.395.932 |
| Δ4-7 | LN875735 | #441            | 50.345.195 | GAATTGACGGCATCCAGGGATCTCAGAAATTATTAGTACATC   | TTTTAAGGG      | CATCAAGTCTAGTGTAACTGTTTCTTCTTCAAGGT              | 50.395.936 |
| Δ4-7 | LN875736 | #452            | 50.345.196 | GAATTGACGGCATCCAGGGATCTCAGAAATTATTAGTACATCC  | GA             | GAAACATCAAGTCTAGTGTAACTGTTTCTTCTTCAAGGT          | 50.395.932 |
| Δ4-7 | LN875737 | #461            | 50.345.193 | GAATTGACGGCATCCAGGGATCTCAGAAATTATTAGTACA     | NNNNNNNNNNNN   | AGTCTAGTGTAACTGTTTCTTCTTCAAGGT                   | 50.395.941 |
| Δ4-7 | LN875726 | #470            | 50.345.196 | GAATTGACGGCATCCAGGGATCTCAGAAATTATTAGTACATCC  | GN             | AACATCAAGTCTAGTGTAACTGTTTCTTCTTCAAGGT            | 50.395.934 |
| Δ4-7 | LN875738 | #479            | 50.345.192 | GAATTGACGGCATCCAGGGATCTCAGAAATTATTAGTAC      | CCCAGGG        | ATCAAGTCTAGTGTAACTGTTTCTTCTTCAAGGT               | 50.395.937 |
| Δ4-7 | LN875739 | #483            | 50.345.196 | GAATTGACGGCATCCAGGGATCTCAGAAATTATTAGTACATCC  | TT             | CATCAAGTCTAGTGTAACTGTTTCTTCTTCAAGGT              | 50.395.936 |
| Δ4-7 | LN875740 | #500            | 50.345.196 | GAATTGACGGCATCCAGGGATCTCAGAAATTATTAGTACATCC  | GGAG           | CATCAAGTCTAGTGTAACTGTTTCTTCTTCAAGGT              | 50.395.936 |
| Δ4-7 | LN875741 | #509            | 50.345.192 | GAATTGACGGCATCCAGGGATCTCAGAAATTATTAGTAC      | CCTTG          | AACATCAAGTCTAGTGTAACTGTTTCTTCTTCAAGGT            | 50.395.934 |
| Δ4-8 | LN875742 | #46             | 50.345.122 | AGAAGTCTGGAGTCTGTGAAGGTACACCCCTGGT           | GGGGGATAATCTGG | CCTGTATGCCGAGACATGCTTGGG                         | 50.416.778 |
| Δ4-8 | LN875743 | #49             | 50.345.195 | GAATTGACGGCATCCAGGGATCTCAGAAATTATTAGTACATC   | GGA            | CTGACATGCTGGCTCTCTCCCTGTATGCCGAGACATGCTTGGG      | 50.416.758 |
| Δ4-8 | LN875744 | #59             | 50.345.197 | GAATTGACGGCATCCAGGGATCTCAGAAATTATTAGTACATCCC | CA             | TGGGCTGACATGCTGGCTCTCTCCCTGTATGCCGAGACATGCTTGGG  | 50.416.754 |
| Δ4-8 | LN875745 | #97             | 50.345.164 | GAATTGACGGC                                  | GTCG           | GGCTCTCTCCCTGTATGCCGAGACATGCTTGGG                | 50.416.768 |
| Δ4-8 | LN875746 | #101<br>clone 1 | 50.345.157 | GAAT                                         | CCGACGGCGG     | GTGGGCTGACATGCTGGCTCTCTCCCTGTATGCCGAGACATGCTTGGG | 50.416.753 |
| Δ4-8 | LN875747 | #101<br>clone 2 | 50.345.192 | GAATTGACGGCATCCAGGGATCTCAGAAATTATTAGTAC      | TCCCAA         | ATCAAGGGTCTACGTGGAATAGTCTTTCCACAGAGTAGCTACTAGC   | 50.416.218 |
| Δ4-8 | LN875748 | #108            | 50.345.196 | GAATTGACGGCATCCAGGGATCTCAGAAATTATTAGTACATCC  | ATA            | GGCTGACATGCTGGCTCTCTCCCTGTATGCCGAGACATGCTTGGG    | 50.416.756 |
| Δ4-8 | LN875749 | #111<br>clone 1 | 50.345.177 | GAATTGACGGCATCCAGGGATCTC                     | NNNNNNNNNN     | TGACATGCTGGCTCTCTCCCTGTATGCCGAGACATGCTTGGG       | 50.416.759 |
| Δ4-8 | LN875750 | #111<br>clone 2 | 50.345.195 | GAATTGACGGCATCCAGGGATCTCAGAAATTATTAGTACATC   | AGGGTATTA      | TGTTTCTTTCTTTCCCCACATCAAGGGTCTACGTGGAATAGTCTTTT  | 50.416.199 |
| Δ4-8 | LN875751 | #123            | 50.345.184 | GAATTGACGGCATCCAGGGATCTCAGAAATT              | CTCCTTGCGA     | GCTGACATGCTGGCTCTCTCCCTGTATGCCGAGACATGCTTGGG     | 50.416.757 |
| Δ4-8 | LN875752 | #127            | 50.345.197 | GAATTGACGGCATCCAGGGATCTCAGAAATTATTAGTACATCCC | C              | GGCTGACATGCTGGCTCTCTCCCTGTATGCCGAGACATGCTTGGG    | 50.416.756 |
| Δ4-8 | LN875753 | #139            | 50.345.161 | GAATTGAC                                     | CCAGGGA        | GTTTCTGTGACTTCCAGTCCCTCCTGCCAGTAGCAACCTACAAAACA  | 50.416.848 |
| Δ4-8 | LN875754 | #143            | 50.345.178 | GAATTGACGGCATCCAGGGATCTCA                    | CTTC           | CTCTCTCCCTGTATGCCGAGACATGCTTGGG                  | 50.416.770 |
| Δ4-8 | LN875755 | #154            | 50.345.192 | GAATTGACGGCATCCAGGGATCTCAGAAATTATTAGTAC      | CC             | GCTGACATGCTGGCTCTCTCCCTGTATGCCGAGACATGCTTGGG     | 50.416.757 |
| Δ4-8 | LN875756 | #160            | 50.345.192 | GAATTGACGGCATCCAGGGATCTCAGAAATTATTAGTAC      | NNNNNNN        | GCTGACATGCTGGCTCTCTCCCTGTATGCCGAGACATGCTTGGG     | 50.416.757 |
| Δ4-8 | LN875757 | #175            | 50.345.196 | GAATTGACGGCATCCAGGGATCTCAGAAATTATTAGTACATCC  | NNNNNNNNNNNNNN | TGACATGCTGGCTCTCTCCCTGTATGCCGAGACATGCTTGGG       | 50.416.759 |
| Δ4-8 | LN875758 | #189            | 50.345.194 | GAATTGACGGCATCCAGGGATCTCAGAAATTATTAGTACAT    | NNN            | GGGCTGACATGCTGGCTCTCTCCCTGTATGCCGAGACATGCTTGGG   | 50.416.755 |
| Δ4-8 | LN875759 | #191            | 50.345.196 | GAATTGACGGCATCCAGGGATCTCAGAAATTATTAGTACATCC  | GGAGGG         | GGGCTGACATGCTGGCTCTCTCCCTGTATGCCGAGACATGCTTGGG   | 50.416.755 |
| Δ4-8 | LN875760 | #210            | 50.345.192 | GAATTGACGGCATCCAGGGATCTCAGAAATTATTAGTAC      | TCCCA          | TGGGCTGACATGCTGGCTCTCTCCCTGTATGCCGAGACATGCTTGGG  | 50.416.754 |
| Δ4-8 | LN875761 | #243            | 50.345.192 | GAATTGACGGCATCCAGGGATCTCAGAAATTATTAGTAC      | CCA            | TGGGCTGACATGCTGGCTCTCTCCCTGTATGCCGAGACATGCTTGGG  | 50.416.754 |
| Δ4-8 | LN875762 | #289            | 50.345.192 | GAATTGACGGCATCCAGGGATCTCAGAAATTATTAGTAC      | CCCCAAA        | GCTGACATGCTGGCTCTCTCCCTGTATGCCGAGACATGCTTGGG     | 50.416.757 |
| Δ4-8 | LN875763 | #360<br>clone 1 | 50.345.196 | GAATTGACGGCATCCAGGGATCTCAGAAATTATTATTACATCC  | GGGGACA        | TGGGCTGACATGCTGGCTCTCTCCCTGTATGCCGAGACATGCTTGGG  | 50.416.754 |

|      |          |                 |            |                                              |                     |                                                  |            |
|------|----------|-----------------|------------|----------------------------------------------|---------------------|--------------------------------------------------|------------|
| Δ4-8 | LN875764 | #360<br>clone 2 | 50.345.173 | GAATTGACGGCATCCAGGGA                         | AGG                 | GCTGGCTCTCTCCCTGTATGCCGAGACATGCTTGGG             | 50.416.765 |
| Δ4-8 | LN875765 | #365            | 50.345.192 | GAATTGACGGCATCCAGGGATCTCAGAAATTATTAGTAC      | CCAG                | GGGCTGACGTGCTGGCTCTCTCCCTGTATGCCGAGACATGCTTGGG   | 50.416.755 |
| Δ4-8 | LN875766 | #395            | 50.345.196 | GAATTGANGGCATCCAGGGATCTCAGAAATTATTAGTACATCC  | NN                  | GGGCTGACATGCTGGCTCTCTCCCTGTATGCCGAGACATGCTTGGG   | 50.416.755 |
| Δ4-8 | LN875767 | #400            | 50.345.193 | GAATTGACGGCATCCAGGGATCTCAGAAATTATTAGTACA     | N                   | GGGCTGACATGCTGGCTCTCTCCCTGTATGCCGAGACATGCTTGGG   | 50.416.755 |
| Δ4-8 | LN875768 | #406            | 50.345.192 | GAATTGACGGCATCCAGGGATCTCAGAAATTATTAGTAC      | CCCCA               | TGGGCTGACATGCTGGCTCTCTCCCTGTATGCCGAGACATGCTTGGG  | 50.416.754 |
| Δ4-8 | LN875769 | #469            | 50.345.195 | GAATTGACGGCATCCAGGGATCTCAGAAATTATTAGTACATC   | TCCTCCCC<br>CCCGCCG | TGTATGCCGAGACATGCTTGGG                           | 50.416.780 |
| Δ4-8 | LN875770 | #470<br>clone 1 | 50.345.196 | GAATTGACGGCATCCAGGGATCTCAGAAATTATTAGTACATCC  | TCCAGAG             | TCAAGGGTCTACGTGGAATAGTGCTTTTCCACAGAGTAGCTACTAGCC | 50.416.219 |
| Δ4-8 | LN875771 | #470<br>clone 2 | 50.345.172 | GAATTGACGGCATCCAGGG                          | NNNNNNN             | GCTGGCTCTCTCCCTGTATGCCGAGACATGCTTGGG             | 50.416.765 |
| Δ4-8 | LN875772 | #470<br>clone 3 | 50.345.163 | GAATTGACGG                                   | CCCTCGG             | GCTGGCTCTCTCCCTGTATGCCGAGACATGCTTGGG             | 50.416.765 |
| Δ4-8 | LN875773 | #495            | 50.345.189 | GAATTGACGGCATCCAGGGATCTCAGAAATTATTAG         | CCCCCGG             | TCTTTCTTTCCCCACATCAAGGGTCTACGTGGAATAGTGCTTTCCAC  | 50.416.203 |
| Δ5-7 | LN875774 | #225            | 50.378.449 | AAGGTAGGCTACCCTGTGATAGACACTTAACAGGATACTCGGGG |                     | ACATCAAGTCTAGTGAAGTGTCTTCTTCAAGGT                | 50.395.935 |
| Δ5-7 | LN875775 | #424            | 50.378.410 | TCCAGCCTCGCCTTTGTAATGAGGTGGAATTAACATGAAGGT   | TTCCGGGGC           | TCAAGTCTAGTGAAGTGTCTTCTTCAAGGT                   | 50.395.938 |

**Supplementary Table 11: Putative cryptic recombination signal sequences near breakpoints**

**1. four major breakpoint clusters**

| breakpoint cluster | breakpoint region (cluster underlined)                                                                                  | RSS (5'-3')                                 | strand | type  |
|--------------------|-------------------------------------------------------------------------------------------------------------------------|---------------------------------------------|--------|-------|
| intron 1           | <u>TCTAGGTCTTAGAAA</u> <u>CGTAGAGTTTCAGAGGATCAGCATTAT</u><br><u>ACACACTGTCACACACACACACACTTAAAA</u> <u>ITTCAGATGAGGA</u> | CACTGTCACACACACACACA<br>CTTAAAAAT           | +      | RSS12 |
| intron 3           | <u>TAATCTGAATTGACGGCATCCAGGGATCTCAGAAATTATTAG</u><br><u>TACATCCCACAGTGAATTACCACCTTACTAAAA</u> <u>TATTC</u>              | CACAGTGAATTACCACCTTAC<br>TAAAAATA           | +      | RSS12 |
| intron 7           | <u>TTTTAGATTTTGCTGATGGCATTGCTTGTGAATGTTGCTGT</u><br><u>GGAAACATCAAGTCTAGTGA</u> <u>ACTGTTTCTTCTCAAGGTGA</u><br>TTTG     | CACAGCAACATTCAACAAGC<br>AATGCCATCAGCAAAATCT | -      | RSS23 |
| 3'UTR              | <u>CATGTGCTTTTTCTCAAGCAGGCACACTGGTCCCTTTCAAGG</u><br><u>IGTGGGCTGACATGCTGGCTCTCTCCCTGTATGCCGA</u>                       | CACACCTTGAAAGGGACCAG<br>TGTGCCTGCTTGAGAAAAA | -      | RSS23 |

**2. atypical breakpoints outside clusters**

| nr | patient | Del  | RSS (5'-3')                             | strand | location | type  |
|----|---------|------|-----------------------------------------|--------|----------|-------|
| 1  | #36     | Δ2-3 | CAGAGTGAGGAGGAGCTGATCTGACATT            | +      | intron 3 | RSS12 |
| 2  |         |      | CACTCTGATCTTTACCATCACCAGACTC            | +      | intron 3 | RSS12 |
| 3  | #46     | Δ2-3 | CACCCCCACTCCCATATTATAAAAACT             | -      | intron 3 | RSS12 |
| 4  |         |      | CACAGTAACTCTTAATTGTTAATTCAGTTCGTGTGTTA  | +      | intron 3 | RSS23 |
| 5  | #58     | Δ2-3 | CACAGCCAGGACAGGAGCTGCAGCAACT            | -      | intron 1 | RSS12 |
| 6  |         |      | CACTGTCACACACACACACTTAAAAAT             | +      | intron 1 | RSS12 |
| 7  |         |      | CATAGAGACACCAGAGAGAGAACAATGTTCCAGCCAGG  | -      | intron 1 | RSS23 |
| 8  | #85     | Δ2-7 | CAACATCTCAAAAAACAATAAATGATA             | -      | intron 7 | RSS12 |
| 9  |         |      | CACAGCAACATTCAACAAGCAATGCCATCAGCAAAATCT | -      | intron 7 | RSS23 |
| 10 | #113    | Δ2-3 | CACTGAGCTGTGACTCTTGGGGGAAAGA            | +      | intron 3 | RSS12 |
| 11 |         |      | CATGCTGGGAAACTGTCCTGTGAAAGAGAATAGAAACCT | +      | intron 3 | RSS23 |
| 12 |         |      | CACATTGGGTGGGGGAAAAATTCCTGTTTTCCCAACCA  | -      | intron 3 | RSS23 |
| 13 |         |      | CAATGTGCTGCATTTTCTAATTTCTATGAACACTTCT   | +      | intron 3 | RSS23 |
| 14 |         |      | CACTGTCACACACACACACTTAAAAAT             | +      | intron 1 | RSS12 |
| 15 | #118    | Δ2-3 | CACTGTGAGATGCAAGCTGAAATAAACC            | -      | intron 3 | RSS12 |
| 16 |         |      | CACAGTGTGGTGTTCAGAGGCATAGGCTCTAGGCTCCCT | +      | intron 3 | RSS23 |
| 17 |         |      | CACACTCAATCATTTGTTCTGGAGTCCAGAGGGAAATA  | -      | intron 3 | RSS23 |
| 18 | #119    | Δ2   | CACTGTGACTTCCGGCCCCAGGGAAGCT            | -      | intron 2 | RSS12 |
| 19 |         |      | CACAGTCATGACTGTTTGTTCATTAAGC            | +      | intron 2 | RSS12 |
| 20 |         |      | CACAGTGCTTGGTATGCTCATGGGGGAGGAATAGGGGCT | +      | intron 2 | RSS23 |
| 21 | #143    | Δ2-3 | CACTGTGAGATGCAAGCTGAAATAAACC            | -      | intron 3 | RSS12 |
| 22 |         |      | CACAGTGTGGTGTTCAGAGGCATAGGCTCTAGGCTCCCT | +      | intron 3 | RSS23 |
| 23 |         |      | CACACTCAATCATTTGTTCTGGAGTCCAGAGGGAAATA  | -      | intron 3 | RSS23 |
| 24 |         |      | CACAGTGGGTGGCCTGAGCCCAGAGCAGCTCCCCATATC | +      | intron 1 | RSS23 |
| 25 |         |      | CACAGGGATATGGGGAGCTGCTCTGGGCTCAGGCCACCC | -      | intron 1 | RSS23 |
| 26 | #157    | Δ2-3 | CACATTTGCATAAATATAGACAGAAAGC            | -      | intron 3 | RSS12 |
| 27 |         |      | CACAGTGGGTGGCCTGAGCCCAGAGCAGCTCCCCATATC | +      | intron 1 | RSS23 |
| 28 |         |      | CACAGGGATATGGGGAGCTGCTCTGGGCTCAGGCCACCC | -      | intron 1 | RSS23 |
| 29 | #174    | Δ2-3 | CACTCTCTTAGGCACAGTTGAAAAAT              | -      | intron 3 | RSS12 |
| 30 |         |      | CACAGTATATGGAATTTGATTCAAAAAAT           | -      | intron 1 | RSS12 |
| 31 |         |      | CACAGTATATGGAATTTGATTCAAAAAATCAGGTTCTTA | -      | intron 1 | RSS23 |
| 32 | #199    | Δ2-3 | CACAGTGAATTACCACCTTACTAAAAATA           | +      | intron 3 | RSS12 |
| 33 |         |      | CATATTACTCAGAATCATATTGCTCCAAAGCACAAACT  | +      | intron 3 | RSS23 |
| 34 |         |      | CACCGTGAACAAAAGGGGAAGAAAACA             | -      | intron 1 | RSS12 |
| 35 |         |      | CACAGTCAATCAGAGCTGGTGACCAGAACATTTTATTGA | +      | intron 1 | RSS23 |
| 36 | #199    | Δ2-7 | CAACATCTCAAAAAACAATAAATGATA             | -      | intron 7 | RSS12 |

|    |      |      |                                         |   |          |       |
|----|------|------|-----------------------------------------|---|----------|-------|
| 37 |      |      | CACAGCAACATTCAACAAGCAATGCCATCAGCAAAATCT | - | intron 7 | RSS23 |
| 38 |      |      | CACCGTGAACAAAAGGGGAAGAAAACA             | - | intron 1 | RSS12 |
| 39 |      |      | CACAGTCAATCAGAGCTGGTGACCAGAACATTTTATTGA | + | intron 1 | RSS23 |
| 40 | #204 | Δ2-3 | CACAGTGAATTACCACCTTACTAAAATA            | + | intron 3 | RSS12 |
| 41 |      |      | CATATTACTCAGAATCATATTGTCTCCAAAGCACAAACT | + | intron 3 | RSS23 |
| 42 |      |      | CACCGTGAACAAAAGGGGAAGAAAACA             | - | intron 1 | RSS12 |
| 43 |      |      | CACAGTCAATCAGAGCTGGTGACCAGAACATTTTATTGA | + | intron 1 | RSS23 |
| 44 | #215 | Δ2-3 | CACAGCCAGGACAGGAGCTGCAGCAACT            | - | intron 1 | RSS12 |
| 45 |      |      | CACTGTACACACACACACACTTAAAAT             | + | intron 1 | RSS12 |
| 46 |      |      | CATAGAGACACCAGAGAGAGAACAATGTTCCAGCCAGG  | - | intron 1 | RSS23 |
| 47 | #221 | Δ2-7 | CAACATCCTCAAAAACAATAACAATGATA           | - | intron 7 | RSS12 |
| 48 |      |      | CACAGCAACATTCAACAAGCAATGCCATCAGCAAAATCT | - | intron 7 | RSS23 |
| 49 |      |      | CAATCTCCCTTAGAATATGACAAGAACC            | - | intron 1 | RSS12 |
| 50 |      |      | CACAGCCAGGACAGGAGCTGCAGCAACT            | - | intron 1 | RSS12 |
| 51 |      |      | CATAGAGACACCAGAGAGAGAACAATGTTCCAGCCAGG  | - | intron 1 | RSS23 |
| 52 | #225 | Δ5-7 | CAACATCCTCAAAAACAATAACAATGATA           | - | intron 7 | RSS12 |
| 53 |      |      | CACAGCAACATTCAACAAGCAATGCCATCAGCAAAATCT | - | intron 7 | RSS23 |
| 54 |      |      | CACTGTACAGTCAGGCTTTAAATGAATT            | - | intron 4 | RSS12 |
| 55 |      |      | CACACTCAGCCCTAAGTGAAGCAAGCGTGCATGAGAGTA | + | intron 4 | RSS23 |
| 56 | #256 | Δ2-3 | CACTGAGCTGTGACTCTTGGGGGAAAGA            | + | intron 3 | RSS12 |
| 57 |      |      | CATGCTGGGAAACTGTCTGTGAAAGAGAATAGAAACCT  | + | intron 3 | RSS23 |
| 58 |      |      | CACATTGGGTGGGGGAAAAATTCCTGTTTTCCCAACCA  | - | intron 3 | RSS23 |
| 59 |      |      | CAATGTGCTGCATTTTCTAATTTTCTATGAACACTTCCT | + | intron 3 | RSS23 |
| 60 |      |      | CACTGTACACACACACACACTTAAAAT             | + | intron 1 | RSS12 |
| 61 | #257 | Δ2-3 | CACTGAGCTGTGACTCTTGGGGGAAAGA            | + | intron 3 | RSS12 |
| 62 |      |      | CATGCTGGGAAACTGTCTGTGAAAGAGAATAGAAACCT  | + | intron 3 | RSS23 |
| 63 |      |      | CACATTGGGTGGGGGAAAAATTCCTGTTTTCCCAACCA  | - | intron 3 | RSS23 |
| 64 |      |      | CAATGTGCTGCATTTTCTAATTTTCTATGAACACTTCCT | + | intron 3 | RSS23 |
| 65 |      |      | CACTGTACACACACACACACTTAAAAT             | + | intron 1 | RSS12 |
| 66 | #266 | Δ2-3 | CACAACACATGTACCACATGCACATATA            | - | intron 3 | RSS12 |
| 67 |      |      | CACCACATATAACCCCCACATATATACA            | - | intron 3 | RSS12 |
| 68 |      |      | CACATACATGCACACACAAACATATGAC            | - | intron 3 | RSS12 |
| 69 |      |      | CACACACATACATGCACACACAAACATA            | - | intron 3 | RSS12 |
| 70 |      |      | CACAGAACTTCATGACAGTTTTGATTTTAGATTAAGTA  | + | intron 3 | RSS23 |
| 71 |      |      | CACATACATATACATACATCACACACCACATATACCCCC | - | intron 3 | RSS23 |
| 72 |      |      | CACATACATGCACACACAAACATATGACACACACAACAT | - | intron 3 | RSS23 |
| 73 |      |      | CACACACATACATGCACACACAAACATATGACACACACA | - | intron 3 | RSS23 |
| 74 |      |      | CACATACACACACACACCACACACATACATGCACACACA | - | intron 3 | RSS23 |
| 75 | #291 | Δ2-7 | CAACATCCTCAAAAACAATAACAATGATA           | - | intron 7 | RSS12 |
| 76 |      |      | CACAGCAACATTCAACAAGCAATGCCATCAGCAAAATCT | - | intron 7 | RSS23 |
| 77 | #304 | Δ2-3 | CATCCAGGGTAGGGACTGAACAAAGTCA            | - | intron 3 | RSS12 |
| 78 | #327 | Δ2-3 | CACAGTGAATTACCACCTTACTAAAATA            | + | intron 3 | RSS12 |
| 79 |      |      | CATATTACTCAGAATCATATTGTCTCCAAAGCACAAACT | + | intron 3 | RSS23 |
| 80 |      |      | CACCGTGAACAAAAGGGGAAGAAAACA             | - | intron 1 | RSS12 |
| 81 |      |      | CACAGTCAATCAGAGCTGGTGACCAGAACATTTTATTGA | + | intron 1 | RSS23 |
| 82 | #351 | Δ2-3 | CACTGAGCTGTGACTCTTGGGGGAAAGA            | + | intron 3 | RSS12 |
| 83 |      |      | CATGCTGGGAAACTGTCTGTGAAAGAGAATAGAAACCT  | + | intron 3 | RSS23 |
| 84 |      |      | CACATTGGGTGGGGGAAAAATTCCTGTTTTCCCAACCA  | - | intron 3 | RSS23 |
| 85 |      |      | CAATGTGCTGCATTTTCTAATTTTCTATGAACACTTCCT | + | intron 3 | RSS23 |
| 86 |      |      | CACTGTACACACACACACACTTAAAAT             | + | intron 1 | RSS12 |

|     |                      |              |                                         |   |          |       |
|-----|----------------------|--------------|-----------------------------------------|---|----------|-------|
| 87  | #424                 | $\Delta 5-7$ | CAACATCCTCAAAAACAATACAATGATA            | - | intron 7 | RSS12 |
| 88  |                      |              | CACAGCAACATTCAACAAGCAATGCCATCAGCAAAATCT | - | intron 7 | RSS23 |
| 89  |                      |              | CACTGTACAGTCAGGCTTTAAATGAATT            | - | intron 4 | RSS12 |
| 90  |                      |              | CACACTCAGCCCTAAGTGAAGCAAGCGTGCATGAGAGTA | + | intron 4 | RSS23 |
| 91  | #443                 | $\Delta 2-3$ | CACTGAGAGCTGTAACAGAACCAAAAAGA           | - | intron 3 | RSS12 |
| 92  |                      |              | CACTGTCACTGAGAGCTGTAACAGAACC            | - | intron 3 | RSS12 |
| 93  |                      |              | CACAATGGATGCTGCCTTAGATATCACA            | - | intron 3 | RSS12 |
| 94  |                      |              | CACATTGACCTCAGGACAGTATGTGATAGGCTCTTGTGC | + | intron 3 | RSS23 |
| 95  |                      |              | CACTCTGGCTCAGGCCACCCTGGGCTCTTCACTGACT   | - | intron 3 | RSS23 |
| 96  |                      |              | CACTGTCACTGAGAGCTGTAACAGAACCAAAAGAGAACT | - | intron 3 | RSS23 |
| 97  |                      |              | CACAGTGGGTGGCCTGAGCCAGAGCAGCTCCCCATATC  | + | intron 1 | RSS23 |
| 98  |                      |              | CACAGGGATATGGGGAGCTGCTCTGGGCTCAGGCCACCC | - | intron 1 | RSS23 |
| 99  | #101<br>#111<br>#495 | $\Delta 4-8$ | CACAGTGAATTACCACCTTACTAAAATA            | + | intron 3 | RSS12 |
| 100 |                      |              | CATATTACTCAGAATCATATTGTCTCCAAAGCACAACT  | + | intron 3 | RSS23 |
| 101 |                      |              | CACTGTGCTGCAGGTTCTGGCGTCATGATGTTCTTCCA  | - | 3'UTR    | RSS23 |
| 102 |                      |              | CACAGTGTGTTTCTTTCTTTCCCCACATCAAGGGTCTAC | + | 3'UTR    | RSS23 |
| 103 | #139                 | $\Delta 4-8$ | CACAGTGAATTACCACCTTACTAAAATA            | + | intron 3 | RSS12 |
| 104 |                      |              | CATATTACTCAGAATCATATTGTCTCCAAAGCACAACT  | + | intron 3 | RSS23 |
| 105 |                      |              | CACACCTTGAAAGGGACCAGTGTGCCTGCTTGAGAAAAA | - | 3'UTR    | RSS23 |
| 106 | #470                 | $\Delta 4-8$ | CACAGTGAATTACCACCTTACTAAAATA            | + | intron 3 | RSS12 |
| 107 |                      |              | CATATTACTCAGAATCATATTGTCTCCAAAGCACAACT  | + | intron 3 | RSS23 |
| 108 |                      |              | CACTGTGCTGCAGGTTCTGGCGTCATGATGTTCTTCCA  | - | 3'UTR    | RSS23 |
| 109 |                      |              | CACAGTGTGTTTCTTTCTTTCCCCACATCAAGGGTCTAC | + | 3'UTR    | RSS23 |
| 110 |                      |              | CACTGTGCTAGACCTTGGGGAGCTCCAGGGAGCAAGGCA | - | 3'UTR    | RSS23 |
| 111 |                      |              | CACAGTGCCTGGCACAAGGTGAGGGGGGTGCCAGAAAA  | + | 3'UTR    | RSS23 |
| 112 |                      |              | CACAAGGTGAGGGGGGTGCCAGAAAAAGATTCAATTCCC | + | 3'UTR    | RSS23 |
| 113 | #99                  | $\Delta 2-8$ | CACTGTCACACACACACACTTAAAAT              | + | intron 1 | RSS12 |
| 114 |                      |              | CACTGTGCTGCAGGTTCTGGCGTCATGATGTTCTTCCA  | - | 3'UTR    | RSS23 |
| 115 |                      |              | CACAGTGTGTTTCTTTCTTTCCCCACATCAAGGGTCTAC | + | 3'UTR    | RSS23 |
| 116 |                      |              | CACTGTGCTAGACCTTGGGGAGCTCCAGGGAGCAAGGCA | - | 3'UTR    | RSS23 |
| 117 |                      |              | CACAGTGCCTGGCACAAGGTGAGGGGGGTGCCAGAAAA  | + | 3'UTR    | RSS23 |
| 118 |                      |              | CACAAGGTGAGGGGGGTGCCAGAAAAAGATTCAATTCCC | + | 3'UTR    | RSS23 |

**Supplementary Table 12:** Comparison between diagnosis and relapse of 20 mutations in 16 patients with *IKZF1* mutations at the time of diagnosis.

| patient | deletion     | deletion load      | relapse   |
|---------|--------------|--------------------|-----------|
| #110    | $\Delta 4-7$ | high deletion load | conserved |
| #112    | $\Delta 2-7$ | high deletion load | conserved |
| #119    | $\Delta 2$   | high deletion load | lost      |
| #121    | $\Delta 4-7$ | high deletion load | conserved |
| #130    | $\Delta 2-7$ | high deletion load | conserved |
| #179    | $\Delta 4-7$ | low deletion load  | lost      |
| #198    | $\Delta 2-7$ | low deletion load  | lost      |
|         | $\Delta 4-7$ | high deletion load | lost      |
| #199    | $\Delta 2-3$ | N/A                | conserved |
|         | $\Delta 2-7$ | low deletion load  | conserved |
| #204    | $\Delta 2-3$ | high deletion load | lost      |
|         | $\Delta 2-7$ | high deletion load | conserved |
| #243    | $\Delta 2-7$ | high deletion load | conserved |
|         | $\Delta 4-8$ | high deletion load | conserved |
| #289    | $\Delta 4-8$ | high deletion load | lost      |
| #479    | $\Delta 4-7$ | high deletion load | conserved |
| #482    | $\Delta 2-8$ | high deletion load | conserved |
| #483    | $\Delta 4-7$ | high deletion load | conserved |
| #495    | $\Delta 4-8$ | high deletion load | conserved |
| #500    | $\Delta 4-7$ | low deletion load  | lost      |

## Supplementary Figures

**Supplementary Figure 1:** Quantification of deletions  $\Delta 4-7$ ,  $\Delta 2-7$  and  $\Delta 4-8$  by quantitative PCR. Relative concentration of deleted cells was calculated in relation to a standard curve by cell line BV-173 ( $\Delta 4-7$ ) or patient DNA (#100 for  $\Delta 2-7$ , #101 for  $\Delta 4-8$ ). Deletions with a relative concentration  $>1,00E-01$  are considered „high deletion load“, all other deletions are considered „low deletion load“.

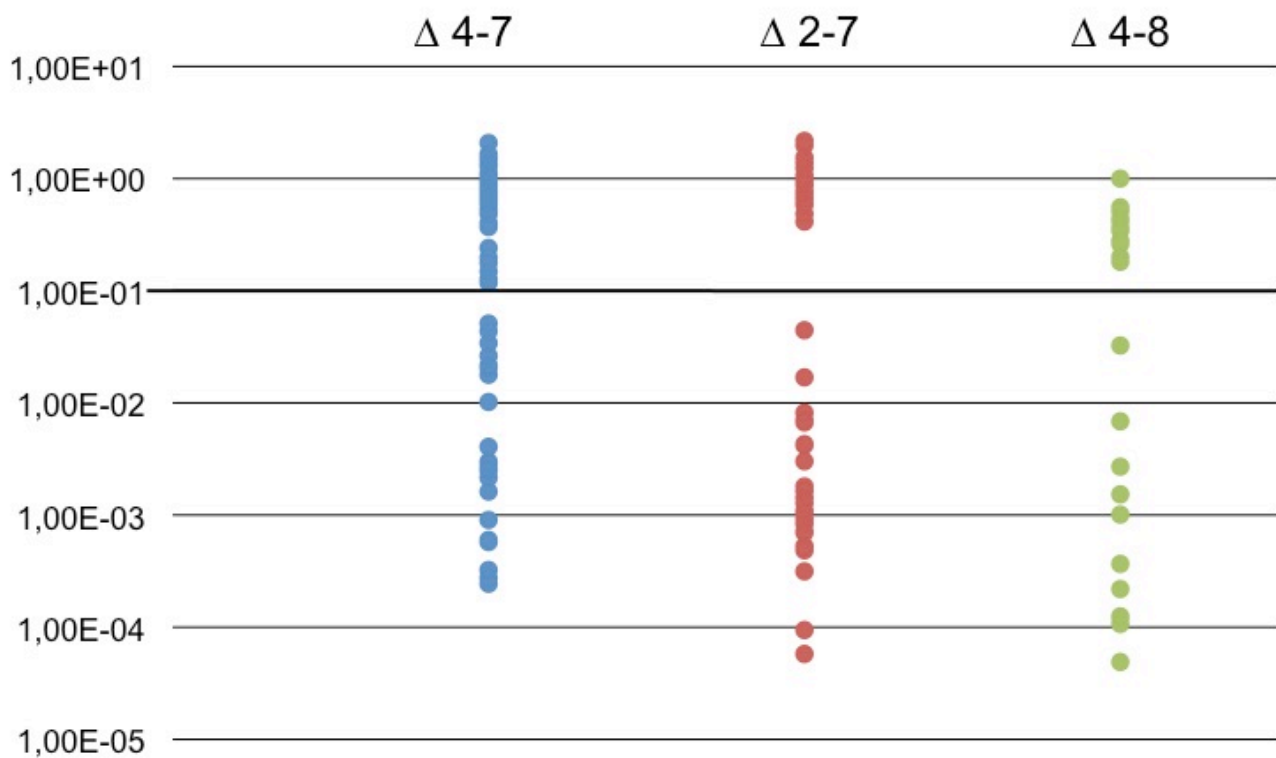

**Supplementary Figure 2: Detection of  $\Delta 2-3$  by RT-PCR.** (A) Patients positive for  $\Delta 2-3$  on RT-PCR (above) show a corresponding lesion detectable by the PCR described by Meyer (below). (B) In this subgroup of patients positive for  $\Delta 2-3$  in RT-PCR ex1/4, a genomic breakpoint could only be identified by a novel PCR  $\Delta 2-3$  B. (C) Patients negative for  $\Delta 2-3$  on RT-PCR. (D) Structure of the 4 PCR products detectable by RT-PCR ex1/4.

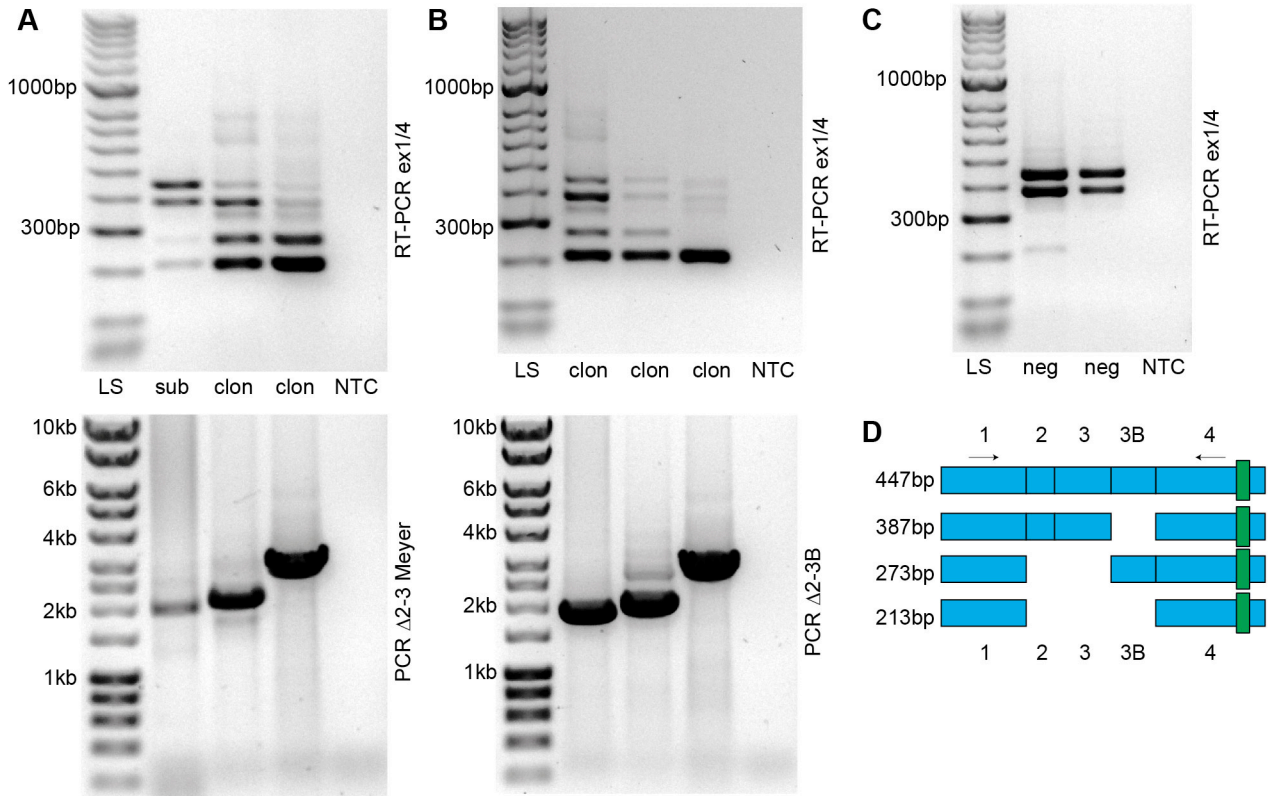



**Supplementary Figure 3:** Additional evaluation of the prognostic effect of *IKZF1* mutations. (A) Overall survival of patients with and without any *IKZF1* mutation. (B) Overall survival of patients with *IKZF1* loss-of-function mutations only, *IKZF1* dominant-negative mutations only or both forms of *IKZF1* mutations.

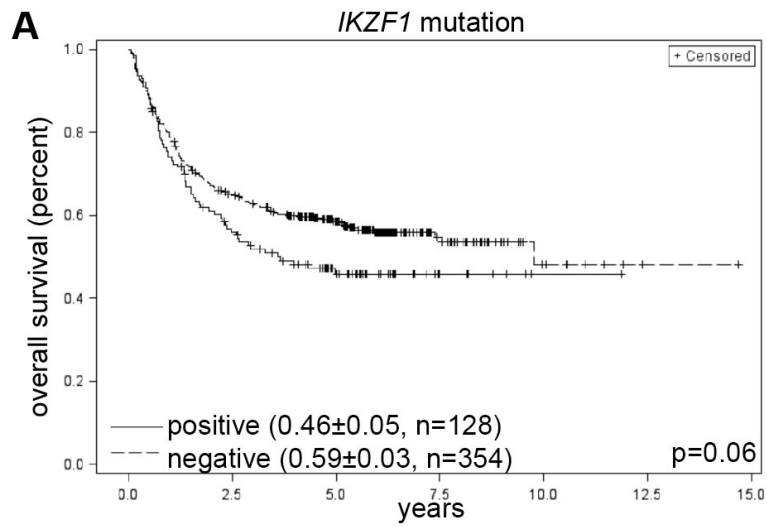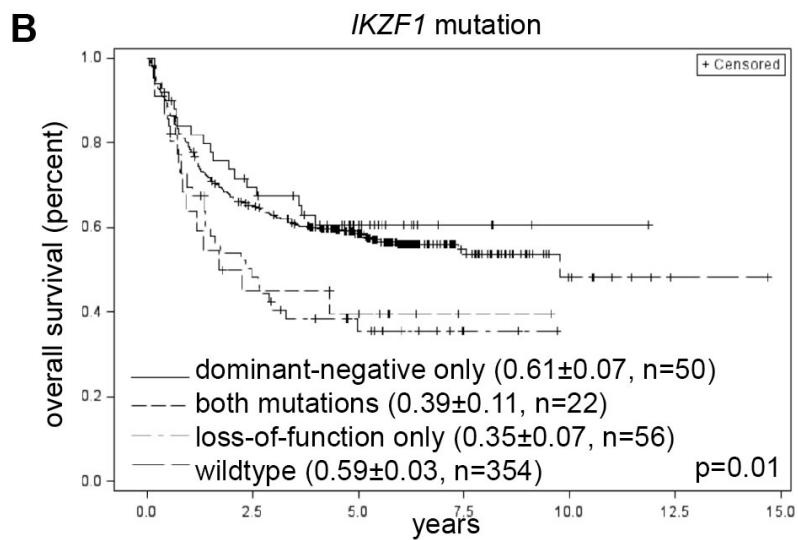

**Supplementary Figure 4:** Detection of rare breakpoints by RT-PCR. (A) Patients #85 and #291 show Ik10 expression on RT-PCR (above), no breakpoint by PCR  $\Delta$ 2-7 (middle) and a breakpoint by PCR  $\Delta$ 2-7 variant (below). (B) Patient #338 exhibits Ik6 and Ik6 $\Delta$  on RT-PCR (above), a breakpoint by PCR  $\Delta$ 4-7 (middle) and a second breakpoint distal to exon 3b by PCR  $\Delta$ 4-7 variant (below). (C) Patient #424 shows Ik6 and Ik6 $\Delta$  expression by RT-PCR (above), no PCR  $\Delta$ 4-7 (middle) and a band by a PCR  $\Delta$ 5-7 (below). (D) Structure of isoforms Ik6 and Ik6 $\Delta$ .

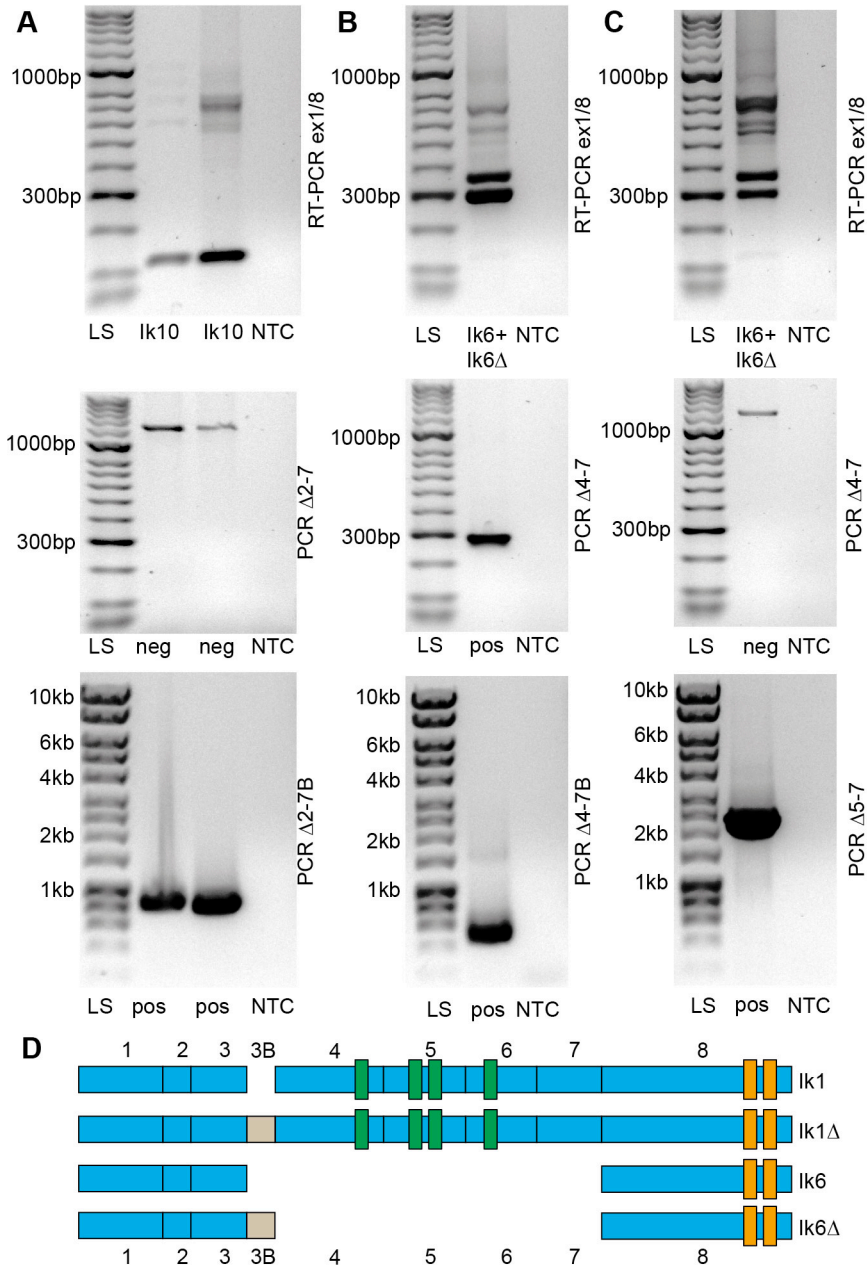

Supplement: 2016.161273.KOBITZSCH_SUPPL.pdf [file 2016.161273.KOBITZSCH_SUPPL.pdf]
