# Supplementary material for: Loss-of-function but not dominant-negative intragenic IKZF1 deletions are associated with an adverse prognosis in adult BCR-ABL-negative acute lymphoblastic leukemia
Source: PubMed Central journal article supplement — Haematologica. 2017 Jul 27;102(10):1739–47. doi: 10.3324/haematol.2016.161273 (PMC5622858; doi:10.3324/haematol.2016.161273), 2017-10
Supplement: 2016_161273-Disclosures_and_Contributions.pdf [file 2016_161273-Disclosures_and_Contributions.pdf]

Haematologica  
HAEMATOL/2016/161273  
Version 4

Loss-of-function but not dominant-negative intragenic IKZF1 deletions are associated with an adverse prognosis in adult BCR-ABL-negative acute lymphoblastic leukemia

Benjamin Kobitzsch, Nicola Gökbuget, Stefan Schwartz, Richard Reinhardt, Monika Brüggemann, Andreas Viardot, Ralph Wäsch, Michael Starck, Eckhard Thiel, Dieter Hoelzer, and Thomas Burmeister

Disclosures: 1. No direct support received for the work under consideration, other than from the academic institutions. 2. Information on support received for work outside the submitted work: TB: research funding and honoraria from Novartis. NG: Sanofi, Equity Ownership; Pfizer: Consultancy, Honoraria, Research Funding; GlaxoSmithKline: Honoraria, Research Funding; Erytech: Consultancy; Eusapharma/Jazz: Consultancy, Honoraria, Research Funding; Gilead Sciences: Consultancy; Kite: Consultancy; Medac: Consultancy, Honoraria, Research Funding; Mundipharma: Consultancy, Honoraria, Research Funding; Bayer: Equity Ownership; SigmaTau: Consultancy, Honoraria, Research Funding; Novartis: Consultancy, Honoraria, Research Funding; Amgen: Consultancy, Honoraria, Research Funding; Bristol-Myers Squibb: Honoraria. DH: member of the boards of Amgen, BMS, and Medac and has acted as a consultant for BMS and Medac. SS: research funding from MSD Sharp & Dohme, Pfizer, Gilead, Astellas, AMGEN. MB: research funding from Amgen. AV served on advisory boards for Amgen. RW: Janssen-Cilag: Research Funding ; MSD: Research Funding. 3. No patents or copyrights broadly relevant to this work.

Contributions: BK performed research, designed research and analyzed data, NG is the study physician of the GMALL study and analyzed data, RR organized sequencing, SS performed immunophenotyping, MB provided relapse samples, AV, RW, MS are major patient recruiters, ET supervised immunophenotyping, DH is the GMALL study head, TB is the principal investigator, designed research and analyzed data. All authors approved and made contributions to the manuscript.
